# Supplementary material for: Identification of hub genes and small-molecule compounds related to intracerebral hemorrhage with bioinformatics analysis
Source: PubMed Central journal article supplement (PMC6816389; doi:10.7717/peerj.7782), 2019-10-25

**A**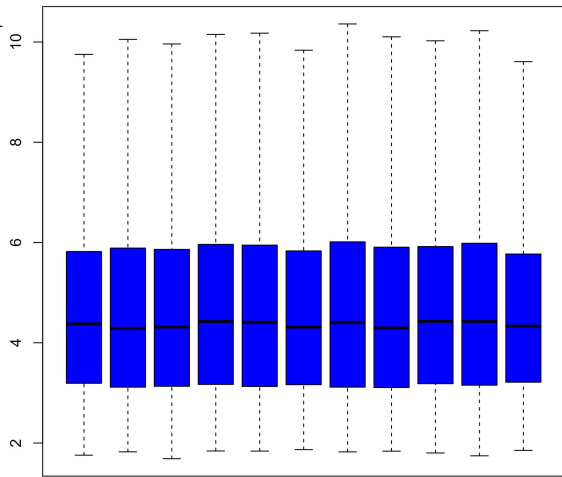**B**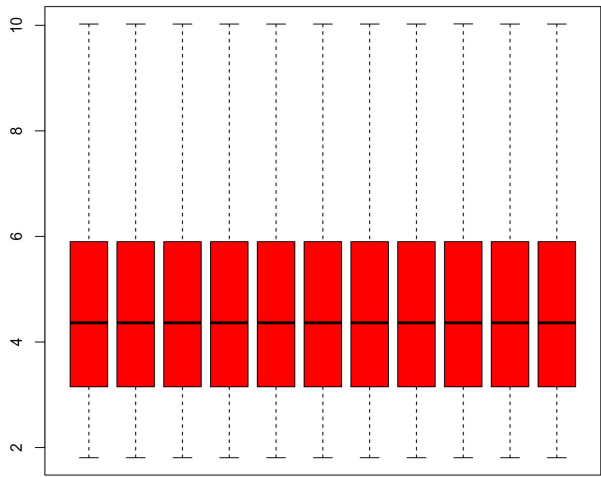

Supplement: peerj-07-7782-s002.pdf [file peerj-07-7782-s002.pdf]
