# Supplementary material for: Identification of hub genes and small-molecule compounds related to intracerebral hemorrhage with bioinformatics analysis
Source: PeerJ. 2019 Oct 25;7:e7782. doi: 10.7717/peerj.7782 (PMC6816389; doi:10.7717/peerj.7782)
Supplement: Supplemental Information 1 — Raw data exported from GSE24265 expression profiling applied for data analyses and preparation for Fig. 1 by using limma package in the R language. [file peerj-07-7782-s001.xlsx]

## Sheet: limmaTab
Gene.symbol	adj.P.Val	P.Value	t	B	logFC
ZNF540	0.0135993	6.28e-07	-10.3341	5.40402	-1.22719
LOC100129550	0.0440931	8.48e-06	-7.88225	3.55586	-1.53838
RP11-53O19.3	0.0440931	1.48e-05	-7.41919	3.12267	-1.00862
BZW1	0.0440931	1.5e-05	7.40879	3.11258	1.23927
TES	0.0440931	1.51e-05	7.40276	3.10674	1.26464
RASSF3	0.0440931	1.65e-05	7.33532	3.0409	1.41974
NIM1K	0.0440931	1.69e-05	-7.31277	3.01873	-1.12756
TFDP1	0.0440931	1.81e-05	7.25833	2.96491	0.627333
AGPAT9	0.0440931	2.07e-05	7.15365	2.86017	3.83383
BAG5	0.0440931	2.21e-05	-7.10164	2.80752	-0.656245
SPHK1	0.0440931	2.45e-05	7.02097	2.72502	1.94102
VGLL3	0.0440931	2.61e-05	6.97146	2.67389	1.43252
IRF2BPL	0.0440931	2.65e-05	-6.96013	2.66214	-0.941401
BLVRB	0.0678316	4.39e-05	6.57568	2.25126	1.04658
MUM1L1	0.0713018	4.94e-05	-6.48719	2.15331	-2.36933
SLFN11	0.0723688	5.47e-05	6.41126	2.06824	0.785371
ZNF236	0.0723688	5.68e-05	-6.38393	2.03739	-0.569203
FBP1	0.0892651	7.42e-05	6.18985	1.8147	0.872788
CHIC2	0.0937177	8.94e-05	6.05612	1.65757	1.0383
SLC25A39	0.0937177	9.3e-05	6.0283	1.62449	0.969919
SMAGP	0.0937177	9.34e-05	6.02516	1.62075	0.898753
KDM7A	0.0937177	9.52e-05	6.01184	1.60486	1.37435
METRNL	0.0946199	0.00010266	5.95866	1.54112	2.32782
ICE1	0.0946199	0.000104866	-5.9437	1.5231	-0.63511
GNS	0.0951355	0.000111755	5.89906	1.46911	0.858811
TCF4	0.0951355	0.000119683	-5.85119	1.41083	-0.806275
ZBTB41	0.0951355	0.000128754	-5.8004	1.34856	-0.929506
NPL	0.0951355	0.00013328	5.77647	1.31907	0.985904
LRRC47	0.0951355	0.000134149	-5.77198	1.31352	-0.689284
MSRB3	0.0951355	0.000141197	5.73663	1.26973	0.426115
TNFRSF12A	0.0951355	0.00014373	5.72438	1.25452	2.01664
ANXA2	0.0951355	0.000144563	5.72041	1.24957	2.00965
UPP1	0.0951355	0.000144977	5.71844	1.24712	2.10593
G0S2	0.0951651	0.000149416	5.69771	1.22128	3.72436
ARHGAP18	0.100414	0.000171192	5.60472	1.10444	1.52799
TOP2B	0.100414	0.000173251	-5.59658	1.09415	-0.576239
ANXA5	0.100414	0.000175207	5.58895	1.08448	1.39768
MGAT1	0.100414	0.000176205	5.58509	1.07959	0.659267
EML4	0.10887	0.000203078	5.48913	0.9571	0.546896
CADM1	0.10887	0.000203357	-5.4882	0.955913	-0.94907
ITGA5	0.10887	0.000209262	5.46895	0.931149	1.6055
B3GNT5	0.10887	0.000217836	5.44201	0.896378	1.0395
VDR	0.10887	0.000219561	5.43673	0.889545	0.615785
RAB8B	0.10887	0.000225613	5.41854	0.865976	0.922214
RSBN1L	0.10887	0.000226236	-5.4167	0.863583	-0.534385
TLN2	0.111628	0.000249832	-5.35059	0.777428	-0.789245
LGALS1	0.111628	0.000251105	5.34722	0.773011	1.3196
DCUN1D3	0.111628	0.000254378	5.33862	0.761746	0.97485
RSBN1	0.111628	0.000265533	-5.31018	0.724389	-0.812843
DAAM1	0.111628	0.000265854	-5.30938	0.723336	-0.98016
MSANTD3	0.111628	0.000278208	5.27937	0.683754	1.19082
ZNF148	0.111628	0.000285536	-5.26223	0.661074	-0.716022
FIGN	0.111628	0.000286969	-5.25894	0.656708	-1.06863
CCSER2	0.111628	0.000296555	5.23732	0.628022	0.582587
CD63	0.111628	0.000306239	5.21622	0.599946	1.10095
NANS	0.111628	0.000309516	5.20924	0.59064	0.51358
SNF8	0.111628	0.000316232	5.19518	0.571868	0.827627
HLA-DPB1	0.111628	0.000320241	5.18694	0.560847	0.764202
HLA-A	0.111628	0.000322521	5.1823	0.554638	1.06424
PMAIP1	0.111628	0.000328463	5.17037	0.538657	2.77778
FKBP4	0.111628	0.000333398	5.16063	0.525598	0.387482
HUS1	0.111628	0.0003377	5.15227	0.514365	0.532707
SESN1	0.111628	0.000340403	-5.14708	0.50738	-1.11454
PAQR5	0.111628	0.000347021	5.13453	0.490503	0.674556
MSS51	0.111628	0.000347865	-5.13295	0.488371	-0.416867
PROCR	0.111628	0.000348846	5.13112	0.485902	1.37861
DNAJA4	0.111628	0.000348864	5.13109	0.485857	1.26234
ZNF764	0.111628	0.00035053	-5.12799	0.48168	-0.678
SEMA3F	0.114977	0.000366354	5.0993	0.442937	0.564159
VASP	0.117356	0.000380221	5.07522	0.410308	1.61487
UQCRQ	0.117356	0.000384775	5.06752	0.399846	0.445413
HLA-B	0.119573	0.000403724	5.03646	0.357572	1.55811
CCDC93	0.119573	0.000421215	5.00914	0.320237	0.665463
BHLHE22	0.119573	0.00043097	-4.99442	0.300068	-1.27081
STIP1	0.119573	0.000434705	4.98887	0.292463	0.578918
NAT9	0.119573	0.000437376	4.98494	0.287065	0.649301
RP11-121C2.2	0.119573	0.000440929	-4.97975	0.279932	-0.99645
ARID4A	0.119573	0.000442316	-4.97773	0.277163	-0.682493
MAPRE1	0.119573	0.00044889	4.96827	0.264153	1.22494
HLA-G	0.119573	0.000450158	4.96646	0.261665	0.951748
SELM	0.119573	0.000452114	4.96368	0.257841	0.818896
ORMDL2	0.119573	0.000452782	4.96274	0.256539	1.67088
ANXA2P2	0.129012	0.00049448	4.90643	0.178751	2.24554
BCAT1	0.130221	0.000509139	4.88782	0.152922	2.08574
ADNP	0.130221	0.000511143	-4.88533	0.149449	-0.898021
PAWR	0.131168	0.000523772	4.86981	0.127857	0.617478
SLC2A3	0.131168	0.000532183	4.85969	0.113756	2.09886
BAI3	0.131168	0.00053303	-4.85868	0.112348	-1.86599
AK055981	0.133421	0.000549036	-4.83991	0.0861482	-1.35428
ZNF791	0.133421	0.000554507	-4.83363	0.0773652	-0.725818
TNFAIP3	0.136741	0.000580104	4.80509	0.037365	3.27981
BCL9	0.136741	0.000580935	-4.80418	0.0360957	-0.531077
RP3-525N10.2	0.138033	0.000592798	-4.79142	0.018165	-1.41527
NEURL1B	0.140511	0.000620633	-4.76251	-0.0225637	-1.64061
LAMTOR5	0.140511	0.000631386	4.7517	-0.0378194	0.568231
AKR1C1	0.140511	0.000646934	4.73642	-0.0594349	0.524852
KBTBD11	0.140511	0.00065237	-4.73116	-0.0668711	-0.658481
RP11-111J6.2	0.140511	0.000667854	-4.71645	-0.0877277	-0.552374
PSMD11	0.140511	0.000678906	-4.70617	-0.102325	-0.474056
SH3BGRL3	0.140511	0.000682839	4.70255	-0.107464	1.22133
KY	0.140511	0.000686192	-4.69948	-0.111822	-0.340853
COL1A2	0.140511	0.000689917	4.6961	-0.11664	1.034
DNAH7	0.140511	0.000705936	-4.68174	-0.137068	-0.461999
CDH4	0.140511	0.000707466	-4.68039	-0.138996	-0.51624
UBE2F	0.140511	0.000709267	4.6788	-0.141259	0.79537
BCAP31	0.140511	0.000710867	4.67739	-0.143265	0.647585
C6orf106	0.140511	0.000716206	4.67272	-0.149928	0.44793
CXCL1	0.140511	0.000717993	4.67117	-0.152147	4.0068
SLFN12	0.140511	0.000724665	4.66539	-0.160385	0.444405
EPC2	0.140511	0.000729141	-4.66155	-0.165868	-0.895895
ERCC6L2	0.140511	0.000740894	-4.65158	-0.180114	-0.333436
PLEKHM3	0.140511	0.000742994	-4.64982	-0.182636	-0.928534
ITGAX	0.140511	0.000745913	4.64737	-0.18613	1.05112
CDV3	0.140511	0.000751929	4.64237	-0.193289	0.889672
C5orf42	0.140511	0.000760025	-4.6357	-0.202835	-0.402919
MPZL2	0.140511	0.000768366	4.62891	-0.212567	0.926766
FLII	0.140511	0.000775932	4.62281	-0.221305	0.8114
ERGIC1	0.140511	0.000779605	4.61988	-0.225515	0.714404
DPH3	0.140511	0.000789219	4.61226	-0.236448	1.10453
MYH9	0.140511	0.000799032	4.60459	-0.247473	1.2492
HDAC4	0.140511	0.000800893	-4.60315	-0.249548	-0.713996
VCAM1	0.140511	0.000809226	4.59672	-0.258785	1.75348
PRKG1	0.140511	0.000810823	-4.5955	-0.260546	-0.533938
SKP2	0.140511	0.000815951	-4.59159	-0.266172	-0.442287
DYNLL2	0.140511	0.000817059	4.59075	-0.267383	0.731322
CRB1	0.140511	0.000817566	-4.59036	-0.267937	-1.06405
HEBP2	0.140816	0.000828199	4.58236	-0.279473	0.97242
ZG16	0.140816	0.000832344	4.57926	-0.28393	0.400042
HLA-C	0.141798	0.000870025	4.55187	-0.323481	1.3031
ERBB4	0.141798	0.000873933	-4.5491	-0.327485	-0.701767
ISG20	0.141798	0.000876313	4.54742	-0.329917	2.37585
DDAH2	0.141798	0.000876697	4.54715	-0.330308	0.621748
LEF1	0.141798	0.000882579	4.54302	-0.336284	0.715324
HLA-F	0.141798	0.000895271	4.5342	-0.349048	1.28291
ERO1L	0.141798	0.000899359	4.53139	-0.353121	1.66388
FAM210A	0.141798	0.000902569	4.5292	-0.356308	0.641847
ANXA2P3	0.141798	0.000903812	4.52835	-0.357538	0.516732
PLAU	0.141798	0.000908843	4.52492	-0.362502	1.05612
FOXK2	0.141798	0.000914962	-4.52079	-0.368503	-0.39495
MPZL1	0.141798	0.000916724	4.5196	-0.370224	0.718651
LOC439938	0.143138	0.000932002	-4.50942	-0.385009	-1.15657
AVEN	0.143263	0.000939431	4.50453	-0.392112	0.663412
PF4	0.143933	0.000950467	4.49734	-0.402564	0.612037
NCBP2	0.14465	0.000967401	4.48649	-0.418371	0.684051
PCYOX1L	0.14465	0.000968564	-4.48575	-0.419446	-1.34075
ZNF827	0.145833	0.000987132	-4.47408	-0.436449	-0.671077
PRDM16	0.145833	0.000989952	-4.47233	-0.439004	-1.31501
C9orf64	0.147211	0.00100644	-4.4622	-0.453801	-0.69183
ARF4	0.147211	0.0010129	4.45827	-0.459533	1.13898
GBE1	0.147337	0.00102057	4.45365	-0.466293	1.16105
NOP10	0.147823	0.00103134	4.44722	-0.475693	0.986448
BCKDK	0.147823	0.00104505	4.43913	-0.487531	0.731003
NUAK1	0.147823	0.0010461	-4.43851	-0.488436	-1.62076
PGBD1	0.147823	0.00105588	-4.43282	-0.496773	-0.669216
LOC286161	0.147823	0.00105807	-4.43155	-0.498633	-0.967757
HMOX1	0.150094	0.00108553	4.41588	-0.521609	2.19582
RASGEF1B	0.150094	0.00109581	4.41013	-0.530061	0.711586
RNA45S5	0.150094	0.00110742	4.40369	-0.539517	1.90289
SSR2	0.150094	0.00111015	4.40219	-0.541725	0.773764
THAP11	0.150094	0.00112043	-4.39657	-0.549994	-0.493575
C15orf48	0.150094	0.00112048	4.39654	-0.550034	4.27405
FAM133A	0.150094	0.00112994	-4.39141	-0.557584	-1.35484
ORAI1	0.150094	0.0011364	4.38793	-0.562701	0.49823
PLAUR	0.150094	0.00113826	4.38694	-0.564163	2.51371
UBL7	0.150094	0.00114364	-4.38406	-0.568396	-0.497376
LINC00537	0.150266	0.00115613	-4.37744	-0.57815	-0.550176
SLC9A3R1	0.150266	0.00115883	-4.37602	-0.580245	-0.736061
PAPPA	0.151712	0.00117761	4.36623	-0.594681	0.70769
UFD1L	0.151712	0.00118808	4.36085	-0.60263	0.6148
SEC14L1	0.151712	0.00119485	4.3574	-0.607731	0.556422
SLC2A1	0.151712	0.00119801	4.35579	-0.610102	0.852509
MAST3	0.151824	0.0012059	-4.3518	-0.616	-1.59035
CTGF	0.152059	0.00121479	4.34734	-0.622597	2.30088
CREBRF	0.152186	0.00122695	-4.34128	-0.631549	-0.588277
MYL12A	0.152186	0.00123179	4.33889	-0.635086	0.872521
DAD1	0.152186	0.0012497	4.33013	-0.648058	0.828403
MAPKAPK2	0.152186	0.00126386	4.3233	-0.658187	0.60442
ALOX5AP	0.152186	0.00126721	4.32169	-0.660567	1.99816
JAK1	0.152186	0.00127252	4.31915	-0.66433	0.876823
LCP1	0.152186	0.00127407	4.31842	-0.66542	1.52246
DDIT3	0.152186	0.00127853	4.3163	-0.668563	1.41662
ZNF786	0.152186	0.00127905	-4.31605	-0.668931	-0.566402
SRA1	0.152588	0.00128947	4.31113	-0.676227	0.971894
RP11-690I21.2	0.152602	0.00129664	-4.30777	-0.681214	-1.60772
SYAP1	0.154009	0.00131982	4.29705	-0.697145	1.33697
DUSP5	0.154009	0.00132979	4.29249	-0.703919	2.39322
FAM169A	0.154009	0.00133417	-4.29051	-0.706876	-0.896045
ATP11B	0.154009	0.00133704	4.2892	-0.708812	0.665116
TRAPPC12	0.156414	0.00136515	-4.27663	-0.727532	-0.744581
LCORL	0.15904	0.00139541	-4.26339	-0.747266	-0.539301
KDM2B	0.160193	0.00141579	-4.25464	-0.760319	-0.673322
LAPTM5	0.160193	0.00142032	4.25271	-0.763197	2.51143
FGR	0.161121	0.00143599	4.24609	-0.773078	2.19746
YTHDF1	0.162249	0.00145353	-4.23878	-0.784016	-0.845658
MBD5	0.162381	0.00146591	-4.23367	-0.791654	-0.663982
CYLD	0.162381	0.00146972	4.23211	-0.79399	0.755916
RPL8	0.163235	0.00150811	4.21659	-0.817223	1.0841
TNFRSF10D	0.163235	0.00152072	4.21158	-0.824727	0.944304
ZNF264	0.163235	0.00152637	-4.20935	-0.828073	-0.767306
MYCT1	0.163235	0.00152752	4.2089	-0.82875	1.86831
SERPINE1	0.163235	0.00154338	4.20269	-0.838061	2.71942
ACTA2	0.163235	0.00155119	4.19966	-0.84261	0.65464
FASTKD3	0.163235	0.00155339	-4.19881	-0.843889	-0.828213
UBE2A	0.163235	0.00156018	4.19619	-0.847818	0.790809
PTGS1	0.163235	0.00156662	4.19372	-0.851535	1.4334
RRAS	0.163235	0.00157004	4.19241	-0.853502	0.961026
PLEK2	0.163235	0.00157688	4.1898	-0.857422	0.504776
TNFRSF10B	0.163235	0.00158265	4.18761	-0.860717	0.887724
ZFC3H1	0.163235	0.00158982	4.1849	-0.864788	0.748125
RP11-247L20.4	0.163235	0.00159771	-4.18193	-0.869254	-0.981031
CDHR3	0.163235	0.00160187	-4.18037	-0.8716	-0.51252
TMEM257	0.163235	0.00161808	-4.17433	-0.880683	-1.46133
CXCL16	0.163235	0.00161952	4.1738	-0.881483	1.87653
RIOK2	0.163235	0.00162623	-4.17132	-0.885217	-0.570328
GPRC5A	0.163235	0.0016366	4.16751	-0.890946	1.7795
ARF6	0.163235	0.00164263	4.1653	-0.894269	0.505954
HLA-J	0.163235	0.00164324	4.16508	-0.894604	1.10999
IL18RAP	0.163235	0.00164328	4.16507	-0.894625	2.8021
SRSF10	0.163809	0.0016641	4.15753	-0.905982	0.604706
MRPL47	0.163809	0.00166661	4.15663	-0.907341	0.463385
C3orf52	0.163809	0.00169637	4.14603	-0.923313	0.782702
KLHL6	0.163809	0.00170567	4.14276	-0.928251	1.50411
ESM1	0.163809	0.00170782	4.14201	-0.929387	1.50868
XKR6	0.163809	0.00171417	-4.13979	-0.932738	-0.362123
ZBTB8OS	0.163809	0.00171512	4.13946	-0.933239	0.638112
HIATL2	0.163809	0.00172319	4.13665	-0.937475	0.627042
GK3P	0.163809	0.00172736	4.13521	-0.939657	0.802914
PPM1K	0.163809	0.00173408	-4.13289	-0.943163	-1.06744
CDH3	0.163809	0.00173773	-4.13163	-0.945058	-0.626616
PERP	0.163809	0.00174185	4.13022	-0.947199	0.662671
TAGAP	0.163809	0.0017474	4.12832	-0.95007	0.882786
POLR2L	0.16457	0.00176312	4.12297	-0.958155	0.637039
MTMR9	0.165213	0.00177973	-4.11737	-0.966627	-0.499689
HSPA13	0.165213	0.00178527	4.11551	-0.969429	0.898852
COG7	0.165218	0.00179912	-4.1109	-0.976408	-0.953746
VNN2	0.165218	0.00181332	4.10621	-0.983511	1.02613
SVIL	0.165218	0.00182126	4.10361	-0.987456	0.564151
TINF2	0.165218	0.00182586	4.1021	-0.989739	0.549439
ANPEP	0.165218	0.00183011	4.10072	-0.991835	0.766981
PRKCH	0.165218	0.001838	4.09815	-0.995724	0.765229
IRAK1	0.165218	0.00183872	4.09792	-0.996076	0.689755
LYZ	0.165568	0.0018605	4.0909	-1.00672	1.75803
CYSTM1	0.165568	0.00187428	4.0865	-1.01339	1.00754
MYO1F	0.165568	0.00188062	4.08449	-1.01643	1.04581
NOD2	0.165568	0.00188161	4.08418	-1.01691	1.31072
IL1RN	0.165568	0.00188296	4.08375	-1.01756	0.705611
PATL1	0.165568	0.00189808	4.07899	-1.02479	0.446656
MAN1C1	0.165568	0.00190199	-4.07777	-1.02664	-1.3036
RP3-406P24.1	0.165568	0.00191197	4.07465	-1.03138	0.543802
RPRD2	0.165568	0.00191824	-4.07271	-1.03433	-0.813471
STAT3	0.165568	0.00191908	4.07244	-1.03473	1.37512
FAM129B	0.165581	0.00193026	4.06899	-1.03998	0.682061
KDR	0.165581	0.0019453	4.06437	-1.047	0.703034
NONO	0.165581	0.0019567	4.0609	-1.05228	0.705759
NUBP1	0.165581	0.00196422	4.05862	-1.05575	0.654483
PBDC1	0.165581	0.00199027	4.05079	-1.06766	0.447866
OR7E14P	0.165581	0.00199496	4.04939	-1.06979	0.547477
DUSP27	0.165581	0.00199581	-4.04914	-1.07017	-0.492832
FOXO3	0.165581	0.00199965	-4.048	-1.07191	-0.480313
BMPR1B	0.165581	0.00201825	-4.0425	-1.08029	-1.11835
RGL1	0.165581	0.00201872	-4.04236	-1.08049	-0.913983
NKX3-1	0.165581	0.00201973	4.04206	-1.08095	0.398694
ITGB1	0.165581	0.0020219	4.04143	-1.08192	0.862277
WEE1	0.165581	0.00202362	4.04092	-1.08269	0.609427
KIAA0226L	0.165581	0.00202885	4.03939	-1.08502	1.91469
C19orf53	0.165581	0.00206322	4.02942	-1.10022	0.50462
CCRL2	0.165581	0.00206348	4.02935	-1.10033	1.03102
FCER1G	0.165581	0.00206797	4.02806	-1.1023	1.61893
WDR19	0.165581	0.00207184	-4.02695	-1.10399	-0.345103
FAM200A	0.165581	0.0020758	-4.02582	-1.10572	-0.601049
PDZK1IP1	0.165581	0.00207872	4.02498	-1.10699	0.666874
TMEM57	0.165581	0.00207979	-4.02468	-1.10745	-0.463781
TUBB6	0.166273	0.00209617	4.02003	-1.11455	2.19143
FYTTD1	0.166423	0.00210574	4.01733	-1.11867	0.714766
RHOC	0.167108	0.00213043	4.01042	-1.12922	0.698852
ZNF436	0.167108	0.00213145	-4.01014	-1.12965	-1.1925
SLC43A3	0.167108	0.00213756	4.00844	-1.13224	0.950078
ZBBX	0.168047	0.00219249	-3.99342	-1.15521	-0.47333
R3HDM4	0.168047	0.00219521	3.99269	-1.15633	0.751798
LSM10	0.168047	0.00220378	3.99039	-1.15986	0.559994
C2CD4B	0.168047	0.0022056	3.9899	-1.1606	0.459709
ZNF140	0.168047	0.00220774	-3.98933	-1.16148	-0.361643
ATP13A3	0.168047	0.00221024	3.98866	-1.1625	1.03313
JHDM1D-AS1	0.168047	0.0022128	3.98797	-1.16355	0.481918
MYLPF	0.168047	0.00221711	3.98682	-1.16531	0.443512
TMEM173	0.168047	0.00224311	3.97993	-1.17587	0.677681
CMTM7	0.168047	0.00224751	3.97877	-1.17765	0.893113
PDCD4	0.168047	0.00225822	-3.97596	-1.18195	-1.04729
TREM2	0.168047	0.00227791	3.97083	-1.18981	0.930314
SNAI2	0.168047	0.00228142	3.96992	-1.1912	0.501724
ENDOG	0.168047	0.0022915	-3.96732	-1.1952	-0.756836
RP11-348P10.2	0.168047	0.0022995	-3.96526	-1.19835	-0.823932
CCL7	0.168047	0.00230655	3.96345	-1.20112	0.567924
PUM2	0.168047	0.00230672	-3.96341	-1.20119	-0.42445
TFPI2	0.168047	0.00231082	3.96236	-1.2028	3.48913
NDP	0.168047	0.00231103	-3.96231	-1.20288	-1.59848
FTL	0.168047	0.00231215	3.96202	-1.20332	1.0148
LRRC8B	0.168047	0.00233025	-3.95742	-1.21038	-0.845765
SRGAP3	0.168047	0.00233252	-3.95685	-1.21126	-0.582907
OCIAD2	0.168047	0.0023344	3.95637	-1.21199	1.28563
LILRA2	0.168047	0.00233582	3.95601	-1.21254	0.584243
VMP1	0.168291	0.00235747	3.95057	-1.2209	3.86367
TAF10	0.168291	0.00236478	3.94874	-1.22371	0.436292
NINJ1	0.168291	0.00236688	3.94822	-1.22451	0.701271
RRAGC	0.168291	0.0023745	3.94632	-1.22742	0.339199
CXCL8	0.168291	0.00238281	3.94426	-1.23058	4.4949
NLRC5	0.168291	0.00238853	3.94285	-1.23276	0.763803
SLC6A6	0.168291	0.00239682	3.94081	-1.23589	0.666551
ARNT2	0.168291	0.00240139	-3.93969	-1.23762	-1.11363
CCL20	0.168929	0.00242422	3.93411	-1.2462	4.4912
CBL	0.168929	0.00242609	3.93365	-1.24689	0.382218
CA5BP1	0.169401	0.00244388	3.92935	-1.25351	0.681138
PTPN6	0.169401	0.00244851	3.92824	-1.25523	0.841835
RP11-1109F11.5	0.169736	0.00246882	-3.92337	-1.26271	-0.611233
HSPD1	0.169736	0.00247197	3.92262	-1.26387	0.710731
COTL1	0.169736	0.00247825	3.92113	-1.26617	1.08554
RBBP4	0.169736	0.0024916	-3.91797	-1.27104	-0.436693
LRP11	0.169736	0.00249693	-3.91671	-1.27298	-0.921521
EFTUD1	0.169736	0.00251463	3.91255	-1.27938	0.591061
LOC153682	0.169736	0.00253788	-3.90714	-1.28772	-0.723105
PDIK1L	0.169736	0.00254082	-3.90646	-1.28877	-1.22984
CD53	0.169736	0.00254891	3.90459	-1.29165	0.989108
NTMT1	0.169736	0.00255746	3.90262	-1.29468	0.648146
PTGES	0.169736	0.00256035	3.90195	-1.29571	0.980537
BRI3BP	0.169736	0.00256758	-3.9003	-1.29827	-1.02049
ELK3	0.169736	0.00257979	3.89751	-1.30256	0.892646
MSR1	0.169736	0.00258188	3.89703	-1.3033	0.734395
CTSL	0.169736	0.00261195	3.89023	-1.3138	1.48107
CTAGE5	0.169736	0.00261701	-3.88909	-1.31555	-0.524665
HMGA1	0.169736	0.00261838	3.88878	-1.31603	0.772659
RALY-AS1	0.169736	0.00261959	3.88851	-1.31644	1.21061
HECW2	0.169736	0.00262761	-3.88672	-1.31922	-0.92493
CYTIP	0.169736	0.00262789	3.88665	-1.31931	3.47421
GLTSCR1L	0.169736	0.00262806	-3.88662	-1.31937	-1.00822
RABGGTB	0.169736	0.00264435	3.88299	-1.32497	0.910486
ZNF250	0.169736	0.00267372	-3.8765	-1.33499	-0.679395
FBXO46	0.169736	0.00267397	-3.87645	-1.33508	-0.500588
RPL6	0.169736	0.00267644	3.87591	-1.33591	0.463982
VKORC1	0.169736	0.00269993	3.87078	-1.34384	1.41112
ARPC4	0.169736	0.0027069	3.86927	-1.34618	0.553119
JADE1	0.169736	0.00271793	-3.86688	-1.34986	-0.480489
CTC-444N24.11	0.169736	0.00272237	-3.86592	-1.35135	-0.839806
NAV3	0.169736	0.00272266	-3.86586	-1.35144	-0.516383
LILRB1	0.169736	0.00272454	3.86546	-1.35207	0.710856
ABCC5	0.169736	0.00272883	-3.86453	-1.35349	-0.599133
CXCL3	0.169736	0.00273032	3.86422	-1.35399	3.62223
AEN	0.169736	0.00273366	3.8635	-1.3551	0.790205
HES4	0.169736	0.00273776	3.86262	-1.35646	0.651471
C8orf33	0.169736	0.0027536	3.85924	-1.36169	0.49661
ZC3H14	0.169736	0.00275609	-3.85871	-1.36251	-0.509395
RP11-422P24.11	0.169736	0.0027691	-3.85595	-1.36678	-0.400974
SH3D21	0.169736	0.00277109	3.85552	-1.36743	1.4865
ZFAND2A	0.169736	0.00278845	3.85186	-1.3731	0.943171
SOX6	0.169736	0.00279206	-3.85111	-1.37427	-0.448463
HINFP	0.169736	0.00279566	-3.85035	-1.37544	-0.490302
HSPB1	0.169736	0.00279729	3.85001	-1.37597	1.43754
LAMA4	0.169736	0.00279823	3.84981	-1.37627	0.460364
BCL7A	0.172453	0.00285099	-3.83887	-1.39322	-0.723927
REXO2	0.172601	0.00286141	3.83674	-1.39653	0.424367
TADA2B	0.172714	0.00287212	-3.83455	-1.39992	-0.666791
NES	0.172714	0.00287975	3.833	-1.40233	0.999055
FBXO21	0.172714	0.00288864	-3.83119	-1.40513	-0.667465
UNKL	0.172714	0.00289519	-3.82987	-1.40718	-0.402869
TEAD4	0.173524	0.00291678	3.82552	-1.41392	1.00004
C8orf76	0.173751	0.00292861	-3.82315	-1.4176	-0.406082
KLF4	0.174579	0.00295062	3.81878	-1.42439	1.55469
RP11-884K10.7	0.17469	0.00296057	-3.81681	-1.42745	-0.463866
CPVL	0.175745	0.00299206	3.81062	-1.43705	1.81012
PROK2	0.175745	0.00301833	3.80552	-1.44498	2.34792
UCP2	0.175745	0.00301935	3.80532	-1.44529	0.898559
C5AR1	0.175745	0.00302121	3.80496	-1.44585	2.20602
SMIM3	0.175745	0.00302658	3.80392	-1.44746	1.20039
ZNF254	0.175745	0.00302866	-3.80352	-1.44809	-0.29667
FXYD5	0.175745	0.00304575	3.80023	-1.45319	1.09575
ADIPOR1	0.175745	0.00305618	3.79824	-1.45629	0.621268
VAMP8	0.175745	0.00305622	3.79823	-1.45631	1.39893
IL1R1	0.175745	0.00305961	3.79758	-1.45731	1.62149
ETS1	0.176977	0.00308922	3.79196	-1.46606	1.33748
RELN	0.177429	0.00316164	-3.77844	-1.4871	-1.52361
SURF4	0.177429	0.00316489	3.77784	-1.48803	0.604472
RP5-1061H20.3	0.177429	0.00316668	3.77751	-1.48854	0.300001
RGS16	0.177429	0.00318017	3.77503	-1.4924	1.1886
RP11-196G18.23	0.177429	0.00318274	-3.77456	-1.49314	-0.961125
HERC1	0.177429	0.00319155	-3.77295	-1.49565	-0.274697
RIT1	0.177429	0.00319572	3.77219	-1.49683	0.852761
NOC3L	0.177429	0.00319584	3.77217	-1.49687	0.634076
CARS	0.177429	0.00319904	3.77158	-1.49777	0.523974
BCL2A1	0.177429	0.00320639	3.77025	-1.49986	3.0258
PRSS23	0.177429	0.00321645	3.76842	-1.5027	0.976989
PPP1R15A	0.177429	0.00322568	3.76675	-1.50531	1.70373
LOC283588	0.177429	0.00323127	-3.76574	-1.50688	-1.91043
HIVEP2	0.177429	0.0032342	-3.76521	-1.5077	-0.57794
ADAP2	0.177429	0.00323602	3.76488	-1.50821	0.715529
HYPK	0.177429	0.0032408	3.76402	-1.50955	0.544329
LINC00623	0.177429	0.00324118	-3.76396	-1.50966	-0.804272
SHROOM2	0.177429	0.00324514	-3.76324	-1.51077	-1.37755
C16orf70	0.177429	0.00325777	-3.76098	-1.51429	-0.498592
COL6A3	0.177429	0.00326099	3.76041	-1.51519	1.85826
GPHN	0.177893	0.00327772	-3.75742	-1.51984	-0.838175
LOC283357	0.177903	0.00328613	-3.75593	-1.52217	-1.21032
MGAM	0.178126	0.00329848	3.75375	-1.52558	1.78696
SLITRK5	0.178227	0.00331876	-3.75018	-1.53114	-2.07887
UPK1A	0.178227	0.00332262	3.7495	-1.5322	0.300365
CXCL11	0.178227	0.00332503	3.74908	-1.53286	0.471603
MAGEH1	0.178631	0.00334849	-3.74499	-1.53924	-0.667224
ZNF329	0.178631	0.00334907	-3.74489	-1.5394	-1.21341
LSMEM1	0.179154	0.00337175	3.74096	-1.54553	1.11292
SPIN4	0.179154	0.00337543	-3.74032	-1.54652	-0.882141
NPM1	0.18098	0.00342217	3.73232	-1.55901	0.479444
FAM83G	0.18098	0.00342654	3.73158	-1.56017	0.598349
TREM1	0.181244	0.00343992	3.72932	-1.56372	2.89447
STK40	0.181569	0.00346163	3.72566	-1.56943	1.03224
SOWAHA	0.181569	0.00347025	-3.72421	-1.57169	-2.13595
THBS1	0.181569	0.00347636	3.72319	-1.57329	1.16511
GZMB	0.181569	0.00348445	3.72184	-1.5754	1.88387
TSNAX	0.181569	0.00349142	-3.72068	-1.57722	-0.510372
GPCPD1	0.181569	0.00350882	3.71779	-1.58173	1.76384
ITGB1BP1	0.181569	0.00352373	3.71532	-1.58559	0.484155
HSPA4	0.181569	0.00352706	3.71478	-1.58644	0.467747
SPCS3	0.181569	0.00353605	3.7133	-1.58876	0.672854
EMX2	0.181569	0.00355558	-3.7101	-1.59376	-1.34612
TMEM56	0.181569	0.00356592	-3.70841	-1.5964	-1.45665
DGCR2	0.181569	0.00357997	-3.70613	-1.59997	-0.477727
SLC12A6	0.181569	0.00358325	3.7056	-1.60081	0.635981
CD93	0.181569	0.00359301	3.70402	-1.60328	2.28478
CDH5	0.181569	0.00359856	3.70312	-1.60468	1.5385
RILPL2	0.181569	0.00359975	3.70293	-1.60498	1.15463
ZBTB16	0.181569	0.00361226	-3.70091	-1.60813	-0.884561
L1TD1	0.181569	0.00363204	3.69774	-1.6131	0.243917
PRKACA	0.181569	0.00364111	3.6963	-1.61537	0.522527
CABYR	0.181569	0.00364668	-3.69541	-1.61675	-0.708053
KPNA4	0.181569	0.00364761	3.69526	-1.61699	0.38243
IRAK3	0.181569	0.00364919	3.69501	-1.61738	1.15858
CXCR4	0.181569	0.0036502	3.69485	-1.61763	1.95024
FLJ26850	0.181569	0.00365468	-3.69414	-1.61874	-0.303479
ARPC3	0.181569	0.0036557	3.69398	-1.619	0.768139
GRPEL1	0.182624	0.00368537	3.68929	-1.62635	1.00644
MPP1	0.182764	0.00370204	3.68667	-1.63045	1.1568
BAG1	0.182764	0.00370614	3.68603	-1.63145	0.599974
RPGR	0.182764	0.00371545	3.68457	-1.63373	1.38525
KIR2DS4	0.182764	0.00372196	3.68356	-1.63533	0.252789
AGO2	0.182881	0.00373371	3.68173	-1.63819	1.18244
RP3-334F4.1	0.182881	0.00374122	3.68056	-1.64002	0.724492
RPLP0	0.183236	0.00375695	3.67813	-1.64383	0.910838
LOC102725017	0.183349	0.00377166	-3.67587	-1.64738	-1.03883
DDX3X	0.183349	0.00379877	3.67172	-1.65389	0.490256
CAPS2	0.183349	0.00380651	-3.67054	-1.65574	-0.570739
RP11-112J3.16	0.183349	0.00380871	-3.6702	-1.65627	-0.783351
MTHFD2	0.183349	0.00381704	3.66894	-1.65825	0.936681
RHOBTB1	0.183349	0.003837	-3.66591	-1.663	-1.21243
MTCL1	0.183349	0.00383748	-3.66584	-1.66311	-1.73091
AHSP	0.183349	0.00384547	3.66464	-1.665	0.552574
ZFAND3	0.183349	0.00385096	3.66381	-1.6663	0.465098
CLPX	0.183349	0.00385852	-3.66267	-1.66808	-0.577598
THBD	0.183349	0.00386596	3.66156	-1.66983	1.53795
FBXL20	0.183349	0.00386854	-3.66117	-1.67044	-0.527943
SLC11A1	0.183349	0.00386933	3.66105	-1.67062	1.29746
HPGDS	0.183443	0.0038798	3.65949	-1.67308	1.42255
PFN1	0.183479	0.00388902	3.65811	-1.67524	1.38567
SLC26A11	0.183779	0.00390874	-3.65519	-1.67984	-1.00238
ZNF330	0.183779	0.00392314	3.65306	-1.68318	0.375858
HAVCR2	0.183779	0.00393371	3.6515	-1.68563	0.575468
MALT1	0.183779	0.00393442	3.65139	-1.68579	1.05194
BRI3	0.183779	0.00393782	3.65089	-1.68658	0.705204
CORO1C	0.183782	0.00395343	3.64861	-1.69017	0.832676
SERPINB8	0.183782	0.00395582	3.64826	-1.69072	0.628237
GPALPP1	0.183782	0.00396334	-3.64716	-1.69245	-0.562949
FN1	0.184373	0.00398461	3.64406	-1.69732	1.03512
TRBC1	0.185018	0.00401056	3.6403	-1.70322	1.56975
SAT1	0.185018	0.00403177	3.63725	-1.70801	1.55306
CREB3	0.185018	0.00404246	3.63572	-1.71042	0.563588
MSN	0.185018	0.00405114	3.63448	-1.71237	0.662379
KIF9	0.185018	0.00405669	3.63369	-1.71362	0.348647
HECW1-IT1	0.185018	0.00406383	3.63267	-1.71522	0.257153
MFSD1	0.185018	0.00407525	3.63105	-1.71777	0.709282
PLEK	0.185018	0.00407565	3.63099	-1.71786	1.23644
CCR7	0.185018	0.00409144	3.62876	-1.72137	0.61702
RNF149	0.185018	0.00409482	3.62828	-1.72212	0.772885
HEXB	0.185018	0.00410631	3.62666	-1.72467	0.871691
PROSER2	0.185018	0.0041175	3.62509	-1.72715	0.469466
TMED5	0.185018	0.00412555	3.62396	-1.72892	0.733255
RPS18	0.185018	0.00412767	3.62366	-1.72939	0.592901
LSM12	0.185018	0.00413092	3.62321	-1.73011	0.477261
CDCP1	0.185018	0.00413524	3.6226	-1.73106	1.0769
FERMT3	0.185519	0.00416087	3.61903	-1.73668	1.24597
MCEMP1	0.185519	0.00416357	3.61866	-1.73727	1.95591
ZAK	0.18569	0.00417599	3.61694	-1.73998	0.512467
OST4	0.185747	0.00418585	3.61557	-1.74212	1.04649
ADAR	0.185775	0.00419505	-3.61431	-1.74412	-0.7804
FLOT1	0.188441	0.00426457	3.60481	-1.75907	0.329556
ZNF703	0.188441	0.00427267	-3.60372	-1.76079	-1.16687
EMG1	0.189555	0.00430667	3.59914	-1.768	1.07063
SPRY1	0.190967	0.00436824	3.59095	-1.78091	0.822401
APOBEC3G	0.190967	0.00438213	3.58912	-1.7838	0.813808
SH3TC1	0.190967	0.00438569	3.58865	-1.78454	0.613868
MYADM	0.190967	0.00438795	3.58836	-1.78501	1.03981
ACOT9	0.190967	0.00438994	3.58809	-1.78542	1.16093
RRAS2	0.190967	0.00439167	3.58787	-1.78578	1.04613
CFD	0.192004	0.00444795	3.58052	-1.79736	0.809363
UBTD2	0.192004	0.00450689	-3.57294	-1.80934	-0.642346
GYPC	0.192004	0.00451673	3.57168	-1.81132	0.825954
ZNF14	0.192004	0.00451684	-3.57166	-1.81134	-0.78097
POLR1B	0.192004	0.0045223	-3.57097	-1.81244	-0.377264
ALKBH4	0.192004	0.00452781	-3.57027	-1.81355	-0.531763
COL4A1	0.192004	0.00453166	3.56978	-1.81432	1.43735
KIAA0232	0.192004	0.00453406	-3.56947	-1.81481	-1.34793
CALN1	0.192004	0.00454822	-3.56767	-1.81764	-1.22556
HCLS1	0.192004	0.00455308	3.56706	-1.81861	1.50607
PLCG2	0.192004	0.00455587	3.56671	-1.81917	0.363376
LINC01122	0.192004	0.00455824	-3.56641	-1.81964	-0.443322
ASB8	0.192004	0.00457021	-3.5649	-1.82203	-0.738692
ZNF30	0.192004	0.00457076	-3.56483	-1.82214	-0.783117
C2orf50	0.192004	0.00457416	-3.5644	-1.82282	-0.418417
S100A11	0.192004	0.00458694	3.56279	-1.82535	2.00733
STOX2	0.192004	0.00459157	-3.56221	-1.82627	-0.943947
CDC42EP4	0.192004	0.00459176	-3.56219	-1.82631	-0.568681
OLR1	0.192004	0.00459851	3.56134	-1.82764	2.4278
TYROBP	0.192004	0.00459901	3.56128	-1.82774	1.98546
BTN3A2	0.192004	0.0046177	3.55894	-1.83144	0.681437
PPP1R9A	0.192004	0.00462032	-3.55861	-1.83195	-0.720743
ZNF614	0.192004	0.00462475	-3.55806	-1.83282	-0.396296
RNF181	0.192004	0.00463585	3.55668	-1.835	0.899444
TGFBI	0.192004	0.0046454	3.5555	-1.83687	2.69105
ZNF667	0.192004	0.00464652	-3.55536	-1.83709	-0.896359
PNP	0.192004	0.00465491	3.55432	-1.83874	2.62103
NCF2	0.192157	0.00467547	3.55178	-1.84275	2.53693
PRSS22	0.192157	0.00467637	3.55167	-1.84292	0.423504
TGM2	0.19262	0.00470442	3.54823	-1.84836	0.823561
TKTL1	0.19262	0.00471999	3.54633	-1.85137	1.37351
ITGAM	0.19262	0.00472014	3.54631	-1.8514	1.65961
URGCP	0.19262	0.00472322	-3.54593	-1.85199	-0.422792
ZNF512B	0.192729	0.00476722	-3.5406	-1.86043	-0.765444
SP100	0.192729	0.00477149	3.54008	-1.86124	0.976292
CARD10	0.192729	0.00477637	3.53949	-1.86217	0.390928
MBLAC2	0.192729	0.00478635	-3.53829	-1.86407	-0.691355
IDH2	0.192729	0.00479514	-3.53724	-1.86574	-0.586649
RP1-212P9.2	0.192729	0.00481897	-3.53439	-1.87025	-0.56383
NPAP1	0.192729	0.00482183	3.53404	-1.87079	0.380603
DCN	0.192729	0.00484058	3.53181	-1.87432	0.766576
ELFN1	0.192729	0.0048459	-3.53118	-1.87532	-0.866065
RPUSD2	0.192729	0.00484957	-3.53075	-1.87601	-0.642454
RNASET2	0.192729	0.00485289	3.53035	-1.87663	0.737245
ZNF623	0.192729	0.00485459	-3.53015	-1.87695	-1.25123
SETD1B	0.192729	0.00485574	-3.53001	-1.87717	-0.997413
CD99P1	0.192729	0.00486502	3.52892	-1.87891	0.691585
APOC1	0.192729	0.0048757	3.52766	-1.8809	0.903869
VAMP7	0.192729	0.00488055	3.52708	-1.88181	0.555598
SEC24A	0.192729	0.0048851	3.52655	-1.88265	1.25991
CSTA	0.192729	0.00489547	3.52533	-1.88458	1.99845
PLA2G7	0.192729	0.00489799	3.52503	-1.88505	1.53512
CTD-3025N20.3	0.192729	0.00491823	-3.52266	-1.8888	-0.944406
METTL7A	0.192729	0.00492451	-3.52193	-1.88997	-0.64466
COX8A	0.192729	0.0049402	3.5201	-1.89286	0.46731
FGD3	0.192729	0.00496098	3.51769	-1.89668	0.769472
PKM	0.192729	0.00496216	3.51755	-1.8969	0.616445
CDT1	0.192729	0.00497507	3.51606	-1.89926	0.295943
PPBP	0.192729	0.00498331	3.51511	-1.90077	3.27044
LCA5L	0.192729	0.00498429	-3.51499	-1.90095	-0.347208
TUSC1	0.192729	0.00498809	-3.51456	-1.90164	-0.615724
CHD6	0.192729	0.00499283	-3.51401	-1.9025	-0.496279
LOC100130872	0.192729	0.00499647	3.51359	-1.90317	0.500801
SERPINB9	0.192729	0.00500178	3.51298	-1.90413	1.15482
MIF	0.1929	0.00501513	3.51145	-1.90656	0.759935
RAB32	0.19304	0.00502769	3.51001	-1.90883	0.372839
RUFY3	0.193854	0.00505805	-3.50655	-1.91431	-0.368782
PDZD2	0.193854	0.00506679	-3.50556	-1.91588	-0.741398
BHLHE40	0.193963	0.00507987	3.50408	-1.91823	1.21626
OAZ1	0.193963	0.00508756	3.50321	-1.91961	0.915476
LONP1	0.19432	0.00511772	3.49982	-1.92499	0.552912
EIF4ENIF1	0.19432	0.00512797	-3.49867	-1.92681	-0.309784
MRPS7	0.19432	0.00513636	3.49773	-1.9283	0.654503
TIMM8B	0.19432	0.00513815	3.49753	-1.92861	0.56285
SOX17	0.19432	0.0051496	3.49625	-1.93064	0.757794
USP21	0.19432	0.00517295	-3.49366	-1.93475	-0.349698
ERCC4	0.19432	0.00517427	-3.49351	-1.93499	-0.878788
TMEM150C	0.19432	0.00518115	-3.49275	-1.9362	-0.68052
ZNF736	0.19432	0.00518403	-3.49243	-1.9367	-0.554117
STC1	0.19432	0.00518665	3.49214	-1.93716	1.69562
PTP4A1	0.194479	0.00519987	3.49068	-1.93948	0.808686
SNX12	0.195238	0.0052292	3.48745	-1.9446	0.311141
ZNF551	0.195463	0.00524425	-3.4858	-1.94721	-0.223056
PARVG	0.195583	0.00527922	3.48199	-1.95326	0.41918
MRPS15	0.195583	0.0052812	3.48177	-1.9536	0.46325
SOX9	0.195583	0.00528216	-3.48167	-1.95377	-1.36051
LOC101929177	0.195583	0.00528357	3.48151	-1.95401	0.48973
NGFRAP1	0.195585	0.0053093	-3.47873	-1.95843	-0.399956
CXCL2	0.195585	0.00531175	3.47846	-1.95885	1.33434
NID1	0.195585	0.00531721	3.47787	-1.95979	0.49989
RPS5	0.195585	0.00532302	3.47725	-1.96078	0.948752
SRGN	0.195585	0.00532879	3.47663	-1.96177	1.79798
INPP5F	0.196392	0.00535985	3.47329	-1.96706	1.26796
IP6K1	0.196505	0.00538007	-3.47113	-1.97049	-1.14193
DNAJB11	0.196505	0.00538555	3.47055	-1.97141	0.979821
DCSTAMP	0.196505	0.00539016	3.47006	-1.97219	0.875483
GPR97	0.196546	0.00540038	3.46897	-1.97391	0.992163
DUSP3	0.196887	0.00542224	3.46666	-1.97759	0.412885
EDN1	0.196887	0.00542791	3.46606	-1.97854	0.92196
HSPA6	0.197456	0.00545273	3.46344	-1.98269	3.1623
ANXA1	0.198607	0.0055019	3.4583	-1.99086	1.04342
GBGT1	0.198607	0.00550284	3.4582	-1.99102	0.39996
CHDH	0.19971	0.00554377	-3.45395	-1.99777	-0.40261
CRIP1	0.19971	0.00555186	3.45312	-1.99909	0.536903
LOC101927534	0.201479	0.0056138	3.44676	-2.00919	0.311707
TMEM8A	0.201479	0.00561964	3.44617	-2.01014	0.618943
NPAT	0.201584	0.00563187	-3.44492	-2.01212	-0.299115
TM2D3	0.201971	0.00565947	-3.44212	-2.01657	-0.680324
RP1-193H18.2	0.201971	0.00566136	-3.44193	-2.01687	-1.81652
RRS1	0.202051	0.00568066	3.43998	-2.01997	0.413649
TCIRG1	0.202051	0.00568543	3.4395	-2.02073	2.44906
FAM120B	0.202051	0.00571172	-3.43686	-2.02493	-0.538951
SDC2	0.202051	0.00571448	3.43658	-2.02537	1.49933
BTF3	0.202051	0.00571479	3.43655	-2.02542	0.392078
TOX4	0.202051	0.00571956	3.43608	-2.02618	0.446812
POP1	0.202569	0.00575138	-3.4329	-2.03123	-0.854779
C1orf64	0.202569	0.0057568	3.43236	-2.03209	0.911802
TPP1	0.202569	0.0057623	3.43181	-2.03296	0.391092
SLC4A1AP	0.202979	0.00578334	-3.42973	-2.03627	-0.470002
NFIB	0.203487	0.00580721	-3.42737	-2.04002	-0.463787
ZXDA	0.203729	0.00582896	-3.42523	-2.04342	-0.961847
CLEC1A	0.203729	0.00583375	3.42476	-2.04417	0.908659
FLNA	0.203729	0.00584638	3.42352	-2.04614	1.03844
LOC100996583	0.203729	0.00585174	3.423	-2.04698	0.291779
C11orf96	0.204779	0.00589136	3.41914	-2.05312	1.37329
DSP	0.205437	0.00591977	3.41639	-2.0575	1.04968
DSERG1	0.205518	0.00594027	-3.41441	-2.06064	-0.780431
PDS5B	0.205518	0.00595473	-3.41302	-2.06286	-0.426621
RAB27A	0.205518	0.0059575	3.41276	-2.06328	1.007
SREK1	0.205518	0.00596781	-3.41177	-2.06485	-0.336953
PIK3R5	0.205518	0.00596957	3.4116	-2.06512	0.719212
H2AFY	0.205545	0.00600552	3.40816	-2.07059	0.585411
ANAPC15	0.205545	0.00601461	3.4073	-2.07196	0.476348
PSMA7	0.205545	0.00601844	3.40694	-2.07254	0.846556
ZNF593	0.205545	0.00602572	3.40624	-2.07364	0.810273
SLC16A5	0.205545	0.0060264	3.40618	-2.07375	0.276493
HERC2	0.205545	0.00603257	-3.4056	-2.07468	-0.817954
ZNF26	0.205545	0.00604113	-3.40478	-2.07597	-0.350279
HCAR3	0.205545	0.00604627	3.4043	-2.07674	2.26339
OXSR1	0.205891	0.00606692	3.40235	-2.07985	0.621402
CTD-2541M15.1	0.205891	0.00607892	-3.40122	-2.08165	-0.500994
EHD4	0.205891	0.00609096	3.40009	-2.08345	0.478671
ZCCHC14	0.205891	0.00609448	-3.39976	-2.08397	-0.398459
DCTN1-AS1	0.205977	0.00611109	-3.3982	-2.08645	-1.52781
ADAM10	0.205977	0.00612347	3.39705	-2.08829	0.478395
SSR4	0.205977	0.00613506	3.39597	-2.09001	0.89688
MGC57346	0.205977	0.00613507	-3.39597	-2.09001	-0.518436
TCF20	0.205997	0.00615158	-3.39443	-2.09246	-0.397791
EXOC8	0.205997	0.00615471	-3.39414	-2.09292	-0.989736
SERP2	0.206196	0.00618745	-3.39111	-2.09775	-0.310085
EIF4G3	0.206196	0.00618764	3.39109	-2.09778	0.618746
IQGAP2	0.206196	0.00621513	3.38856	-2.10182	0.439033
TOB1	0.206196	0.00621952	-3.38815	-2.10246	-1.16814
BBS2	0.206196	0.00623337	-3.38688	-2.10448	-0.905842
CSNK2B	0.206196	0.0062352	3.38672	-2.10475	0.538273
LINC00943	0.206196	0.00624056	-3.38623	-2.10553	-0.342349
CREM	0.206196	0.0062435	3.38596	-2.10596	0.909368
ANKRD12	0.206196	0.00625151	-3.38522	-2.10713	-0.672589
TTC28	0.206196	0.00627026	-3.38351	-2.10986	-0.28914
BCAS3	0.206196	0.00627372	-3.3832	-2.11036	-0.845308
ILK	0.206196	0.0062789	3.38273	-2.11111	0.430707
LRRC4C	0.206196	0.00628443	-3.38222	-2.11191	-0.969185
IFIT5	0.207731	0.00634081	-3.37712	-2.12004	-0.565908
ABCA3	0.208174	0.00636394	-3.37504	-2.12335	-0.464412
ATXN7L1	0.208236	0.00637547	-3.37401	-2.125	-0.213397
KCTD13	0.208478	0.0063925	-3.37249	-2.12743	-0.465405
NABP1	0.208992	0.00643323	3.36886	-2.13321	1.14267
BCL2L13	0.208992	0.00643594	3.36862	-2.13359	0.233994
TGFB1I1	0.208992	0.00643719	3.36851	-2.13377	1.06607
PDLIM1	0.209197	0.00645319	3.3671	-2.13603	1.99967
CRLF1	0.209345	0.0064674	-3.36584	-2.13803	-1.09027
SNX5	0.209701	0.0065036	3.36265	-2.14311	0.47228
HAX1	0.209701	0.00651325	3.36181	-2.14446	0.356604
ANKRD50	0.209701	0.00651359	-3.36178	-2.14451	-0.945439
GNG5	0.209701	0.0065343	3.35997	-2.1474	1.20953
GLRX3	0.209701	0.00653536	3.35987	-2.14755	0.5391
CLIC2	0.209701	0.00653958	3.35951	-2.14814	0.792167
KIAA1107	0.209701	0.0065462	-3.35893	-2.14906	-1.58623
SLC25A33	0.209844	0.00656383	3.35739	-2.15151	0.752933
TYRO3	0.209844	0.00657969	-3.35602	-2.1537	-0.436874
FBXO31	0.209844	0.00657972	-3.35602	-2.15371	-0.976841
IL1R2	0.209941	0.0065967	3.35454	-2.15605	1.72334
ZBTB44	0.209941	0.00660216	-3.35407	-2.15681	-0.382623
COLGALT1	0.210282	0.00662261	3.35231	-2.15962	0.601463
TMEM251	0.21037	0.00664336	3.35052	-2.16247	0.724372
MGAT3	0.21037	0.00665348	-3.34966	-2.16385	-0.434069
TM4SF1	0.21037	0.00665452	3.34957	-2.164	1.87425
TMEM161B-AS1	0.210712	0.00667507	-3.34781	-2.1668	-0.363473
GPN1	0.210853	0.00668925	3.3466	-2.16874	0.797484
HCST	0.211181	0.00670943	3.34488	-2.17148	1.00095
TMEM221	0.211281	0.00672235	-3.34378	-2.17323	-0.368772
SLC3A2	0.211382	0.00673532	3.34268	-2.17498	0.735467
CCL8	0.211442	0.0067659	3.3401	-2.17911	2.0803
RP11-757F18.5	0.211442	0.00676807	3.33992	-2.1794	0.271727
CAV1	0.211442	0.00677529	3.33931	-2.18037	1.51473
SNRPG	0.211442	0.00677656	3.3392	-2.18054	0.684278
PDGFD	0.211442	0.00678606	-3.33841	-2.18181	-0.448605
SEC22A	0.212839	0.00684265	-3.33367	-2.18937	-0.555345
PECAM1	0.212839	0.00686475	3.33183	-2.19231	0.686894
GJA4	0.212839	0.0068653	3.33179	-2.19238	0.882078
RSPO1	0.212839	0.00687021	3.33138	-2.19303	0.326442
VDAC2	0.213378	0.00690071	3.32886	-2.19706	0.574638
TMEM30A	0.213378	0.00690733	3.32831	-2.19794	0.386204
THUMPD1	0.213385	0.0069174	-3.32748	-2.19926	-0.679061
TBP	0.213676	0.00693672	-3.32589	-2.2018	-0.456682
NR3C2	0.213741	0.00695674	-3.32425	-2.20442	-1.3788
CAST	0.213741	0.00696905	3.32324	-2.20603	0.707125
TNIP1	0.213741	0.00698112	3.32226	-2.20761	0.533085
RAB42	0.213741	0.00698351	3.32206	-2.20792	0.97906
MMP19	0.213741	0.00699596	3.32105	-2.20954	0.476406
SAR1A	0.213741	0.00699803	3.32088	-2.20981	0.712167
STMN1	0.215344	0.00706047	-3.31582	-2.2179	-0.925226
CTNNBIP1	0.215452	0.00708388	-3.31393	-2.22091	-0.624773
CD300A	0.215452	0.0070934	3.31317	-2.22213	0.819393
RABGEF1	0.215452	0.0071028	3.31241	-2.22334	1.66868
CMC1	0.215452	0.00711002	3.31184	-2.22426	0.868892
DDX26B	0.215452	0.00711475	-3.31146	-2.22487	-0.378595
POLR2J	0.215452	0.00713147	3.31012	-2.227	0.499278
APOA1BP	0.215452	0.00713364	3.30995	-2.22728	0.461954
FCGRT	0.217195	0.00721506	3.30348	-2.23761	0.60456
TRIM68	0.217195	0.00723509	-3.30191	-2.24013	-0.666252
MLX	0.217195	0.00723597	3.30184	-2.24024	0.46576
ZNF25	0.217195	0.00723997	-3.30152	-2.24075	-0.774841
GAL	0.217195	0.00726904	3.29924	-2.24439	0.388945
RGS1	0.217195	0.00727216	3.299	-2.24478	1.9355
LILRA1	0.217195	0.00728066	3.29833	-2.24585	0.272516
REV1	0.217195	0.00728136	-3.29828	-2.24594	-0.349434
HAS1	0.217195	0.00729159	3.29748	-2.24721	1.84427
ATP6V0E1	0.217195	0.00729165	3.29747	-2.24722	0.639543
TGIF1	0.217628	0.00732667	3.29475	-2.25158	0.641481
PCGF5	0.217628	0.00733136	3.29438	-2.25216	0.590587
RP6-201G10.2	0.217628	0.00733679	-3.29396	-2.25284	-1.66404
TMCO3	0.217628	0.00734795	3.2931	-2.25422	0.727237
PARP2	0.217628	0.00738432	-3.29029	-2.25871	-0.320676
ZNF469	0.217628	0.00739605	-3.28938	-2.26016	-0.654584
ZNF346	0.217628	0.00740024	-3.28906	-2.26068	-0.463865
IMPAD1	0.217628	0.00740352	3.28881	-2.26108	0.28917
SH3RF1	0.217628	0.00740514	3.28868	-2.26128	0.671618
KIAA0391	0.217628	0.0074208	3.28748	-2.2632	0.328153
EPM2AIP1	0.217628	0.00742214	-3.28738	-2.26336	-0.731531
PQBP1	0.217628	0.0074268	3.28702	-2.26394	0.401509
TUBD1	0.217773	0.00744178	-3.28588	-2.26577	-0.33102
SPI1	0.218175	0.00746837	3.28385	-2.26901	0.301748
TK2	0.218175	0.00747752	-3.28315	-2.27013	-0.332005
PHPT1	0.218175	0.00749153	3.28209	-2.27183	0.54059
STIM2	0.218175	0.00749673	-3.28169	-2.27246	-0.352683
FAM46A	0.218175	0.00750591	3.281	-2.27358	0.622702
SLA	0.218401	0.00752376	3.27964	-2.27574	1.54781
CSNK1E	0.219696	0.00757854	3.27552	-2.28234	0.550888
IFNGR1	0.220396	0.00761284	3.27295	-2.28645	1.04491
IRF7	0.221844	0.00767312	3.26846	-2.29363	0.796033
PHB2	0.221931	0.00769074	3.26716	-2.29572	0.350665
TMX1	0.221931	0.00769663	3.26673	-2.29641	0.729131
EFHC2	0.222331	0.00773436	-3.26395	-2.30086	-0.607453
UBQLN2	0.222331	0.00774914	-3.26286	-2.3026	-0.783556
VCL	0.222331	0.00775123	3.26271	-2.30285	0.628404
SH3BP5L	0.222331	0.00775154	-3.26268	-2.30288	-0.596863
ECM2	0.22238	0.00776355	3.2618	-2.30429	0.605533
RPL10L	0.222696	0.00778519	3.26022	-2.30683	0.734813
HBD	0.222696	0.00780334	3.2589	-2.30894	2.71141
CCDC186	0.222696	0.00780842	-3.25853	-2.30954	-0.397962
GSTA4	0.222696	0.00782245	-3.25751	-2.31117	-0.545965
XIRP1	0.222696	0.007826	3.25725	-2.31158	0.48275
ABCC12	0.222883	0.00784657	-3.25576	-2.31397	-0.241357
HYAL2	0.222883	0.00785761	3.25496	-2.31525	0.699586
PTRF	0.222883	0.00786343	3.25454	-2.31593	0.835914
MLLT3	0.223093	0.00788113	-3.25326	-2.31797	-0.586758
GCH1	0.223159	0.00789377	3.25235	-2.31943	1.97289
FTX	0.22328	0.00791287	-3.25098	-2.32163	-1.25797
FBXO11	0.22328	0.00791869	-3.25056	-2.3223	-0.610608
TCF15	0.223376	0.00793241	3.24958	-2.32387	0.531425
TP53I3	0.223892	0.00796992	3.2469	-2.32817	1.70343
KIAA0895L	0.223892	0.00797142	-3.24679	-2.32834	-0.632498
LOC102723918	0.224074	0.00798822	-3.24559	-2.33025	-1.03828
TRIM13	0.224176	0.0080234	-3.2431	-2.33425	-0.46941
COL4A2	0.224176	0.00802476	3.243	-2.33441	1.21892
CD69	0.224176	0.00802699	3.24284	-2.33466	1.89499
PINX1	0.224176	0.00803328	3.2424	-2.33537	0.507149
SYTL3	0.224335	0.00804931	3.24126	-2.33719	1.04208
CDIPT	0.22447	0.00806456	-3.24019	-2.33891	-0.642689
TNFAIP2	0.224522	0.00808101	3.23903	-2.34076	0.89641
RFX7	0.224522	0.00808714	-3.2386	-2.34145	-0.584841
ERN1	0.224588	0.00809988	3.23771	-2.34288	0.678328
C12orf73	0.224726	0.00811525	-3.23663	-2.34461	-0.420305
ACTR3	0.225048	0.00813727	3.23509	-2.34707	0.415177
USP10	0.225331	0.00816269	3.23332	-2.34991	0.435199
TRIM27	0.225331	0.00817546	-3.23243	-2.35134	-0.297143
AQP5	0.225331	0.00817871	3.23221	-2.3517	0.382091
IGF1R	0.225391	0.00819602	-3.23101	-2.35362	-0.421285
ESAM	0.225391	0.00820172	3.23061	-2.35425	0.673388
MGRN1	0.225418	0.00821309	-3.22982	-2.35551	-0.455515
CSNK1D	0.226086	0.00826368	3.22634	-2.3611	0.389163
B2M	0.226086	0.00827468	3.22558	-2.36231	1.28562
HDAC9	0.226086	0.00827712	-3.22542	-2.36258	-0.397612
HIGD2A	0.226086	0.00828885	3.22461	-2.36387	0.256088
LONRF3	0.226086	0.00829983	3.22386	-2.36507	0.436793
TMEM178A	0.226086	0.00830008	-3.22384	-2.3651	-1.52825
BTBD2	0.226827	0.00833778	-3.22127	-2.36922	-0.580077
BCCIP	0.227474	0.00840101	3.21698	-2.3761	0.709952
USP42	0.227474	0.00840147	-3.21695	-2.37615	-0.32394
SYCE2	0.227474	0.00840294	-3.21685	-2.37631	-0.252407
SQRDL	0.227474	0.00840355	3.21681	-2.37637	1.6205
BAALCOS	0.227895	0.008431	-3.21496	-2.37934	-0.347535
EPS8	0.227895	0.00844017	3.21434	-2.38033	0.92216
ZFP82	0.228007	0.00845484	-3.21336	-2.38191	-0.362083
MPHOSPH8	0.228704	0.00849124	-3.21092	-2.38582	-0.623143
B3GNT8	0.228906	0.00850931	3.20971	-2.38775	0.462606
RNF103	0.229152	0.00852906	-3.2084	-2.38986	-0.375994
SLC2A12	0.229183	0.00855214	-3.20686	-2.39232	-0.847869
RPL22L1	0.229183	0.00855358	3.20677	-2.39247	1.20577
RP5-930J4.4	0.229183	0.00856193	-3.20621	-2.39336	-0.580842
HK2	0.229346	0.00858417	3.20474	-2.39572	1.64388
IL6	0.229346	0.00859332	3.20414	-2.39669	2.54431
C14orf28	0.229346	0.00859982	-3.20371	-2.39738	-0.704157
PCDHGA9	0.230968	0.00867129	3.19901	-2.40491	0.206316
DEPDC5	0.231601	0.00871513	-3.19615	-2.40949	-0.300991
CNTN3	0.231601	0.00873174	-3.19507	-2.41123	-2.18639
GARNL3	0.231601	0.00873743	-3.1947	-2.41182	-0.293917
MAP1LC3B	0.231601	0.00873785	3.19468	-2.41186	0.76158
M6PR	0.232061	0.00878347	3.19172	-2.4166	1.01992
NFKBIE	0.232061	0.00878699	3.1915	-2.41696	1.18078
ETHE1	0.232061	0.00878985	3.19131	-2.41726	0.942612
OTUD7A	0.232061	0.00881067	-3.18997	-2.41941	-0.6403
MOB1A	0.232061	0.00882787	3.18886	-2.42119	0.897629
ZNF268	0.232061	0.00883343	-3.18851	-2.42176	-0.36195
BCL10	0.232061	0.00886651	3.18639	-2.42516	1.37902
DUSP26	0.232061	0.00887167	-3.18606	-2.42569	-0.908873
NR2F2-AS1	0.232061	0.00887388	3.18592	-2.42591	0.220673
NR1D2	0.232061	0.00888792	-3.18502	-2.42735	-0.93687
PRKAA2	0.232061	0.00889984	-3.18426	-2.42857	-0.731533
PPP4C	0.232061	0.00890534	3.18391	-2.42913	0.603689
ZNF658	0.232061	0.00890749	-3.18377	-2.42935	-0.959136
RP11-119F7.5	0.232061	0.00891973	-3.18299	-2.4306	-0.91751
SAMD12	0.232061	0.0089335	-3.18212	-2.43201	-0.644184
KDELR2	0.232061	0.0089392	3.18176	-2.43258	0.834469
RNF40	0.232061	0.00895468	3.18078	-2.43416	0.420963
GPR4	0.232061	0.00895766	3.18059	-2.43446	0.681956
SDK1	0.232061	0.00897912	-3.17923	-2.43664	-0.377858
MMP3	0.232061	0.00898497	3.17886	-2.43723	1.03041
PTPN12	0.232061	0.0089899	3.17855	-2.43773	0.638229
PIK3R1	0.232061	0.00899562	-3.17819	-2.43831	-0.981274
PLXNC1	0.232061	0.00900466	-3.17762	-2.43922	-0.556044
TCP11L1	0.232061	0.00901241	3.17713	-2.44	0.582445
ROBO4	0.232355	0.00904783	3.17491	-2.44357	0.4773
SAMD4A	0.232355	0.00905508	3.17446	-2.4443	0.333876
IL32	0.232355	0.00905599	3.1744	-2.44439	0.475426
SQSTM1	0.233177	0.00911075	3.17098	-2.44988	0.808532
KCTD10	0.233177	0.00911402	3.17078	-2.4502	0.469386
EHD2	0.233177	0.00915246	3.16839	-2.45403	0.449857
RP3-486D24.1	0.233177	0.00916697	3.1675	-2.45547	0.744252
PPP2R2B	0.233177	0.00917242	-3.16716	-2.45601	-0.364416
SLIT2	0.233177	0.0091743	-3.16704	-2.4562	-1.61647
PRC1	0.233177	0.00919192	-3.16596	-2.45794	-1.33161
CLIC4	0.233177	0.00920418	3.1652	-2.45915	1.64333
NXF1	0.233177	0.00922575	3.16387	-2.46128	0.825575
HLA-DRA	0.233177	0.00922677	3.16381	-2.46138	2.03579
CAP1	0.233177	0.00924325	3.1628	-2.46301	0.698514
STK10	0.233177	0.00924526	3.16268	-2.4632	0.620243
PRDM11	0.233177	0.00924572	-3.16265	-2.46325	-0.438698
CD48	0.233177	0.00925134	3.1623	-2.4638	0.677252
ZPR1	0.233177	0.00927079	3.16111	-2.46571	1.19598
RCSD1	0.233177	0.00928387	3.16031	-2.467	1.15105
SLITRK1	0.233177	0.00928417	-3.1603	-2.46702	-1.43697
KDM3B	0.233177	0.00928589	-3.16019	-2.46719	-0.568957
LIN54	0.233177	0.00929263	-3.15978	-2.46785	-0.60163
CAND1	0.233729	0.00932541	-3.15779	-2.47105	-0.473425
C12orf75	0.235763	0.00942173	3.15196	-2.4804	1.4381
ICAM1	0.235763	0.00945854	3.14976	-2.48395	1.1796
RAC2	0.235763	0.00946896	3.14913	-2.48495	1.00715
KMT2D	0.235763	0.00948261	-3.14832	-2.48626	-0.375623
GATA3	0.235763	0.00948665	3.14807	-2.48664	0.600897
SERPINH1	0.235763	0.00949116	3.14781	-2.48708	1.25074
ZC3H12C	0.235763	0.00950753	-3.14683	-2.48864	-0.562872
SLAIN2	0.235763	0.00951217	3.14655	-2.48909	0.255072
WDR1	0.235763	0.00951296	3.14651	-2.48916	0.627245
CFP	0.235763	0.00953357	3.14528	-2.49113	0.47155
GLCCI1	0.235763	0.00953884	-3.14497	-2.49163	-0.522951
GRIA2	0.235763	0.00953992	-3.1449	-2.49174	-1.41486
RP11-350F4.2	0.235763	0.0095481	-3.14442	-2.49252	-0.617128
PTX3	0.237071	0.00962363	3.13996	-2.49968	3.53334
MAP1S	0.237071	0.00962666	-3.13978	-2.49997	-0.589801
CST7	0.237071	0.00963392	3.13935	-2.50065	1.03162
EMCN	0.237099	0.00966343	3.13762	-2.50343	0.917839
PLP2	0.237099	0.00967593	3.13689	-2.50461	1.67249
CALHM1	0.237099	0.00968069	-3.13661	-2.50506	-0.473681
TMEM120A	0.237099	0.0096893	3.1361	-2.50586	0.665864
PLIN2	0.237099	0.0096898	3.13607	-2.50591	1.46991
LAMP3	0.237373	0.00971195	3.13478	-2.50799	0.737397
ARG2	0.237686	0.00973574	3.1334	-2.51021	1.05594
RP11-263K19.4	0.237765	0.00977311	-3.13123	-2.51369	-0.446744
PDCD2	0.237765	0.00977898	3.13089	-2.51424	0.322076
TMEM117	0.237765	0.00978252	-3.13068	-2.51457	-0.824061
GZMA	0.237765	0.0097829	3.13066	-2.5146	1.06198
NGFR	0.238347	0.00982733	3.1281	-2.51872	0.984533
MRPL24	0.238347	0.00982886	3.12801	-2.51887	0.59506
YME1L1	0.238946	0.00986459	3.12595	-2.52217	0.375506
ZFP2	0.239115	0.00988259	-3.12492	-2.52382	-0.797384
COL6A2	0.23924	0.00989907	3.12398	-2.52534	0.392345
ZC3H4	0.23924	0.00990988	-3.12336	-2.52633	-0.418935
ZNF48	0.239476	0.00997337	-3.11975	-2.53214	-0.58598
IARS2	0.239476	0.00998951	3.11883	-2.53361	0.36608
AZIN1	0.239476	0.0099952	3.11851	-2.53412	0.732081
PPIB	0.239476	0.0100032	3.11805	-2.53485	0.678222
KLHL22	0.239476	0.010011	-3.11762	-2.53556	-0.258586
CELSR2	0.239476	0.0100181	-3.11721	-2.5362	-1.2593
TRPT1	0.239476	0.0100367	3.11616	-2.53789	0.547912
RASSF8	0.239476	0.010042	3.11586	-2.53837	0.484642
CAV2	0.239476	0.0100529	3.11525	-2.53936	1.02919
COMMD1	0.239476	0.0100629	3.11469	-2.54026	0.613753
EEF1A1P42	0.239476	0.010067	3.11446	-2.54063	0.76484
FAM101B	0.239476	0.0100714	3.11421	-2.54103	1.05869
TIMM10B	0.239476	0.0100744	3.11404	-2.5413	0.390544
TAF13	0.239476	0.0100745	3.11404	-2.5413	0.38872
PHF14	0.240236	0.0101175	-3.11162	-2.54518	-0.518155
ACVR2A	0.240973	0.0101597	-3.10927	-2.54896	-0.889916
SH3GLB1	0.241407	0.0102101	3.10647	-2.55346	0.793249
HCP5	0.241407	0.0102114	3.1064	-2.55357	0.952505
TSHZ1	0.241407	0.0102114	-3.1064	-2.55358	-0.951636
TMBIM6	0.24166	0.0102333	3.10518	-2.55553	0.667444
IL13RA1	0.241998	0.0102588	3.10378	-2.55779	1.02525
MRPL54	0.24225	0.0102807	3.10257	-2.55972	0.566952
TMC1	0.242544	0.0103043	3.10127	-2.56181	0.261173
VMO1	0.242713	0.0103227	3.10026	-2.56343	0.640072
LCP2	0.243009	0.0103465	3.09896	-2.56553	0.829782
ERBB2	0.243211	0.0103664	-3.09788	-2.56727	-0.38871
TMEM208	0.243272	0.0103802	3.09712	-2.56848	0.676048
MRPS14	0.243634	0.0104254	3.09466	-2.57243	0.321268
SFT2D2	0.243634	0.0104262	3.09462	-2.5725	0.814714
FAM217B	0.243634	0.0104294	-3.09445	-2.57278	-1.52579
TMEM43	0.244537	0.0104794	3.09174	-2.57712	0.438125
ERICH4	0.244942	0.010508	-3.0902	-2.5796	-0.325717
POMP	0.245061	0.0105311	3.08896	-2.5816	0.475195
KCTD20	0.245061	0.0105495	3.08797	-2.58318	0.307686
PCID2	0.245061	0.0105516	3.08786	-2.58337	1.00559
SLC39A11	0.245061	0.0105584	-3.0875	-2.58395	-1.12117
DHRS13	0.245176	0.0105747	3.08662	-2.58535	0.75408
ALAS2	0.245539	0.0106017	3.08518	-2.58766	0.919975
ADM	0.245835	0.010635	3.08341	-2.59052	2.13008
PRKCZ	0.245835	0.0106408	-3.0831	-2.59102	-0.835031
RP4-758J24.5	0.245835	0.0106541	-3.08239	-2.59215	-0.996214
AX747730	0.245835	0.0106598	-3.08209	-2.59264	-0.332716
ZNF711	0.245963	0.0106767	-3.08119	-2.59408	-0.383663
HBB	0.246204	0.0106986	3.08003	-2.59594	2.42424
CCDC129	0.246271	0.0107323	3.07826	-2.59879	0.229793
NIF3L1	0.246271	0.0107329	-3.07822	-2.59885	-0.60637
PPFIA2	0.246271	0.0107417	-3.07776	-2.59959	-0.800645
SESN3	0.246271	0.010747	3.07748	-2.60004	0.5693
ZNF213-AS1	0.24693	0.0107921	-3.07512	-2.60384	-0.608989
HDLBP	0.24693	0.0108229	3.07351	-2.60643	0.277924
TMEM192	0.24693	0.010828	-3.07324	-2.60686	-0.504935
NBPF20	0.24693	0.0108439	3.07241	-2.60819	1.08543
EIF3K	0.24693	0.0108575	3.0717	-2.60933	0.473691
RGS10	0.24693	0.0108647	3.07133	-2.60993	0.827307
USP22	0.24693	0.0108667	-3.07122	-2.6101	-0.201598
SNRPD3	0.24693	0.010867	3.0712	-2.61013	0.825118
FUT10	0.247673	0.0109117	-3.06888	-2.61385	-0.243475
ARID1B	0.247673	0.0109254	-3.06817	-2.615	-0.286015
MRPL27	0.247673	0.010934	3.06773	-2.61571	0.533321
TIMP1	0.248331	0.0109915	3.06477	-2.62048	2.55151
YBX1	0.248331	0.010996	3.06453	-2.62085	0.878504
RASGEF1A	0.248331	0.0109974	-3.06446	-2.62097	-0.759515
RP11-24D15.1	0.248655	0.0110252	-3.06303	-2.62326	-0.315502
MARCO	0.248655	0.0110366	3.06245	-2.6242	2.19629
ZBTB45	0.248655	0.0110546	-3.06153	-2.62568	-0.256069
CAPG	0.248655	0.011068	3.06084	-2.62678	1.23027
RHBDF2	0.248655	0.0110692	3.06078	-2.62688	0.960989
NFYA	0.248778	0.0110973	3.05935	-2.62918	0.431331
FRAT2	0.248778	0.0110976	-3.05933	-2.62921	-0.6609
FAM167A	0.248922	0.0111156	-3.05842	-2.63067	-0.429523
MYO9A	0.249139	0.0111368	-3.05734	-2.63241	-0.683413
PVR	0.249367	0.0111585	3.05624	-2.63418	0.187266
GPX1	0.249553	0.0111854	3.05488	-2.63637	1.15118
MOGAT2	0.249553	0.0111898	3.05466	-2.63672	0.221973
DSCR3	0.250131	0.0112421	3.05202	-2.64096	0.32139
RHOA	0.250131	0.0112464	3.05181	-2.6413	0.551823
KIRREL3	0.250131	0.0112504	-3.0516	-2.64163	-1.50155
FGFR1	0.250175	0.0112639	3.05093	-2.64272	0.655088
COL23A1	0.250225	0.0112777	-3.05023	-2.64383	-0.507902
RP11-209A2.1	0.251421	0.0113558	3.04634	-2.6501	0.738521
CUL4A	0.251421	0.0113569	3.04628	-2.65019	0.562352
ZRANB1	0.251421	0.0113724	-3.04551	-2.65143	-0.453595
ZDHHC21	0.251421	0.0113781	-3.04523	-2.65188	-0.356656
PSMD8	0.251682	0.0114015	3.04407	-2.65375	1.07926
PHF5A	0.251727	0.0114152	3.04339	-2.65484	0.495552
LOC100507431	0.252684	0.0114703	-3.04067	-2.65921	-0.36691
PIP4K2B	0.252719	0.0114835	-3.04002	-2.66026	-0.397712
SAMSN1	0.252818	0.0114997	3.03922	-2.66154	1.33407
VPS11	0.253203	0.0115486	-3.03682	-2.66539	-0.427051
ZNF142	0.253203	0.0115543	-3.03654	-2.66584	-0.272335
ZNF341	0.253203	0.0115626	-3.03614	-2.66649	-0.277421
TAGLN	0.253203	0.0115724	3.03566	-2.66726	0.714273
ETF1	0.253203	0.011579	3.03534	-2.66777	0.529798
LINC00299	0.253203	0.011595	-3.03456	-2.66903	-0.288066
IPO4	0.253203	0.0116063	3.03401	-2.66992	0.905139
S100A10	0.253203	0.0116228	3.03321	-2.6712	0.734777
MTERF2	0.253203	0.01163	-3.03286	-2.67177	-0.735602
EMR3	0.253203	0.0116341	3.03266	-2.67209	0.280818
TTC33	0.253215	0.0116464	-3.03206	-2.67305	-0.55676
OSTF1	0.253274	0.011669	3.03097	-2.67481	0.578834
CXCL12	0.253274	0.0116995	3.02949	-2.67718	1.22219
C5orf30	0.253274	0.0117233	-3.02834	-2.67903	-1.04303
ERVH48-1	0.253274	0.0117267	3.02818	-2.67929	0.2525
SYT17	0.253274	0.0117272	-3.02815	-2.67933	-1.61962
TM9SF1	0.253274	0.0117274	3.02815	-2.67934	0.535398
PIAS1	0.253274	0.0117505	-3.02703	-2.68113	-0.917149
CTSC	0.253274	0.0117519	3.02697	-2.68124	1.30706
TSPAN3	0.253274	0.0117591	3.02662	-2.68179	0.304373
KCTD4	0.253274	0.0117667	-3.02626	-2.68238	-1.31008
PFDN2	0.253274	0.0117791	3.02566	-2.68333	0.718032
RP11-4M23.7	0.253274	0.0117895	3.02516	-2.68413	0.333823
P4HA1	0.253795	0.0118254	3.02344	-2.6869	0.580693
PLEKHA1	0.253895	0.0118418	-3.02266	-2.68816	-0.626634
TECPR2	0.253935	0.0118582	-3.02188	-2.68941	-0.986059
EPHB1	0.253935	0.0118794	-3.02087	-2.69104	-0.932585
PAX6	0.253935	0.0118861	-3.02055	-2.69155	-1.22697
LOC100134822	0.253935	0.0118906	-3.02034	-2.69189	-0.988843
IL15	0.254049	0.0119098	3.01942	-2.69336	0.344034
CREB3L3	0.254049	0.0119194	3.01897	-2.69409	0.263956
PPAPDC3	0.25411	0.0119378	-3.0181	-2.69549	-0.601215
ADGB	0.25411	0.0119457	3.01773	-2.69609	0.252459
CD86	0.254348	0.0119686	3.01664	-2.69783	0.598771
MCCC1	0.254986	0.0120104	-3.01468	-2.70099	-0.372433
RHBDL3	0.255665	0.0120542	-3.01262	-2.7043	-0.346411
DAP	0.256048	0.0120869	3.01109	-2.70675	0.680042
FOXC2	0.256048	0.0121032	3.01033	-2.70798	0.482708
PTRH2	0.256048	0.0121078	3.01012	-2.70832	0.287884
CASP4	0.256338	0.0121333	3.00893	-2.71024	0.663471
RELT	0.256413	0.0121487	3.00821	-2.71139	0.70129
TNFRSF1B	0.256447	0.0121629	3.00755	-2.71245	1.5978
RPS10L	0.256447	0.0121881	3.00638	-2.71433	0.90278
MIEN1	0.256447	0.0121909	3.00625	-2.71454	0.459165
USP7	0.256447	0.0121977	-3.00594	-2.71504	-0.47082
LIF	0.2567	0.0122235	3.00474	-2.71696	1.48231
LOC153546	0.2567	0.0122424	-3.00387	-2.71836	-0.824339
HRAS	0.2567	0.0122453	3.00374	-2.71857	0.468263
DNAJC15	0.257159	0.0122854	3.00189	-2.72154	0.535957
CHRNA2	0.257159	0.0122909	3.00164	-2.72195	0.251682
LAPTM4B	0.257175	0.0123305	2.99983	-2.72487	0.684943
AKAP1	0.257175	0.0123368	-2.99954	-2.72533	-0.269528
NGB	0.257175	0.012364	-2.99829	-2.72733	-0.813591
YWHAH	0.257175	0.0123702	2.99801	-2.72779	0.807067
RNF7	0.257175	0.0123809	2.99752	-2.72857	0.474142
C1orf54	0.257175	0.0123854	2.99731	-2.72891	0.820657
TARBP1	0.257175	0.0124048	-2.99643	-2.73033	-0.797555
ATF4	0.257175	0.0124218	2.99566	-2.73157	0.971584
PURG	0.257175	0.0124254	-2.9955	-2.73183	-0.52683
VPS37C	0.257175	0.0124281	2.99537	-2.73203	0.300602
RPL31	0.257175	0.0124306	2.99526	-2.73221	0.495842
ODC1	0.257175	0.0124342	2.9951	-2.73247	0.842264
EIF4G1	0.257265	0.0124504	2.99436	-2.73366	0.569725
DOCK8	0.257572	0.0124772	2.99315	-2.73561	0.680417
STX8	0.257753	0.0124978	2.99221	-2.73711	0.268879
GSTO1	0.258092	0.0125262	2.99093	-2.73916	0.52997
RYR2	0.258583	0.012562	-2.98932	-2.74175	-1.80592
MORN2	0.259238	0.0126089	2.98722	-2.74513	0.686754
NDNF	0.259238	0.0126249	2.9865	-2.74629	0.540475
LOC100287896	0.259238	0.0126469	-2.98552	-2.74787	-1.00761
IL18R1	0.259238	0.0126555	2.98514	-2.74848	0.700613
LOC730101	0.259238	0.0126627	2.98482	-2.749	1.01883
PTPRC	0.259238	0.0126656	2.98468	-2.74921	1.1993
IQCH-AS1	0.259427	0.0126868	-2.98374	-2.75073	-0.568533
MRPL14	0.259622	0.0127084	2.98278	-2.75227	0.503228
CORO2B	0.259785	0.0127534	-2.98079	-2.75548	-0.77898
PNKP	0.259785	0.0127655	2.98025	-2.75634	0.700558
ASCC2	0.259785	0.0127744	2.97986	-2.75697	0.643932
TFPI	0.259785	0.0127841	2.97943	-2.75766	1.3461
ZC3H6	0.259785	0.0128018	-2.97865	-2.75892	-0.894281
PTCHD1	0.259785	0.0128035	-2.97857	-2.75904	-1.503
ZNF92	0.259785	0.0128078	-2.97838	-2.75934	-0.263519
CLK3	0.259785	0.012818	2.97793	-2.76006	0.506798
LINC01410	0.259785	0.0128243	-2.97766	-2.76051	-0.208945
SIN3A	0.259805	0.0128436	-2.97681	-2.76187	-0.501135
TNIP2	0.259805	0.0128551	2.9763	-2.76269	0.736037
CBX7	0.259805	0.0128646	-2.97589	-2.76336	-1.25253
CTD-2124B8.2	0.259805	0.0128843	-2.97502	-2.76474	-0.967922
OLFML3	0.259805	0.0128882	2.97485	-2.76502	1.22014
ZMYM3	0.259805	0.0129349	-2.97281	-2.7683	-0.539344
KLHL42	0.259805	0.0129357	-2.97278	-2.76836	-0.516054
PPP1R18	0.259805	0.0129385	2.97265	-2.76856	1.02428
LAMC1	0.259805	0.0129472	2.97228	-2.76916	1.12364
CDH22	0.259805	0.0129565	-2.97187	-2.76982	-0.378601
USP20	0.259805	0.0129607	-2.97169	-2.77011	-0.625723
NRXN3	0.259805	0.0129735	-2.97113	-2.771	-0.929311
TCEB1	0.259805	0.0129813	2.97079	-2.77155	0.594215
SOAT1	0.259809	0.013007	2.96968	-2.77334	0.846278
HSPA9	0.259809	0.0130118	2.96947	-2.77367	0.314229
HOTAIRM1	0.259809	0.0130174	2.96922	-2.77407	0.309237
LMCD1	0.259973	0.0130377	2.96835	-2.77548	1.20877
CD55	0.260246	0.0130664	2.9671	-2.77748	1.61524
LOC100240734	0.260246	0.0130856	-2.96628	-2.77881	-0.393529
CCL4	0.260246	0.0130874	2.9662	-2.77894	2.81722
KHDRBS3	0.261457	0.0131688	-2.9627	-2.78456	-0.588334
JMJD1C-AS1	0.261457	0.0131725	2.96254	-2.78481	0.352998
CEACAM3	0.261719	0.0131978	2.96146	-2.78655	0.226692
TNFSF8	0.262749	0.0132618	2.95873	-2.79094	0.366592
MYL4	0.262848	0.013279	2.958	-2.79211	0.433572
EXPH5	0.263028	0.0133002	-2.9571	-2.79356	-0.348309
SATB1	0.264271	0.0133752	-2.95392	-2.79867	-1.3144
ZNF211	0.264466	0.0133973	-2.95299	-2.80017	-0.690245
RIPK4	0.264502	0.0134114	2.9524	-2.80112	0.344362
SLC25A45	0.265131	0.0134687	-2.94999	-2.80498	-0.587393
AMOTL1	0.265131	0.013473	2.94981	-2.80528	0.441188
C4orf29	0.265131	0.0134907	-2.94907	-2.80646	-0.470859
ZNF550	0.265131	0.013501	-2.94864	-2.80716	-0.291592
BAIAP2-AS1	0.265131	0.0135164	-2.948	-2.80819	-0.620334
FABP4	0.265131	0.0135167	2.94798	-2.80821	0.398514
ELL	0.265323	0.0135388	2.94706	-2.80969	0.358029
RABAC1	0.266221	0.0136103	2.94409	-2.81447	0.39968
YPEL4	0.266221	0.013621	-2.94365	-2.81518	-1.31333
SLC18A1	0.266221	0.0136215	-2.94363	-2.81521	-0.222646
PTPN22	0.266302	0.0136379	2.94295	-2.81631	0.233729
ZBTB33	0.266559	0.0136815	-2.94115	-2.8192	-0.492578
SNRPD2	0.266559	0.0136951	2.94059	-2.8201	0.752156
SUV39H1	0.266559	0.0136978	-2.94048	-2.82028	-0.659843
ZNF529	0.266559	0.013702	-2.9403	-2.82056	-0.523098
PDIA6	0.266559	0.0137126	2.93987	-2.82126	0.81911
TTI1	0.266618	0.013728	-2.93923	-2.82228	-0.532982
TLR2	0.266664	0.0137426	2.93863	-2.82324	2.20146
UBE2NL	0.266846	0.0137774	2.93721	-2.82553	0.336832
TPM3	0.266846	0.0137882	2.93676	-2.82625	0.55213
SLMO2	0.266846	0.0137956	2.93646	-2.82673	0.578621
CCL5	0.266846	0.0138013	2.93623	-2.82711	1.37726
FUCA2	0.267364	0.0138405	2.93463	-2.82968	0.811996
C14orf132	0.267459	0.0138577	-2.93393	-2.8308	-1.02317
SIRT1	0.267469	0.0138733	-2.93329	-2.83183	-0.657756
ZNF273	0.267469	0.0138831	-2.9329	-2.83246	-0.620921
SERPINA1	0.267469	0.0138953	2.9324	-2.83326	0.872025
POU6F1	0.267796	0.0139247	-2.93121	-2.83517	-0.454256
LAMC3	0.268311	0.0139698	2.92938	-2.83811	0.266047
SLC7A7	0.268311	0.0139776	2.92907	-2.83861	1.32466
EIF6	0.268311	0.0139886	2.92862	-2.83933	1.19848
OSTC	0.26939	0.0140704	2.92534	-2.84461	1.00574
CDK4	0.26939	0.0140781	2.92503	-2.84511	0.660497
AGL	0.26939	0.0140822	-2.92486	-2.84537	-0.783237
DXO	0.269606	0.0141059	2.92391	-2.8469	0.286029
NDUFA11	0.269689	0.0141227	2.92324	-2.84798	0.300194
SIPA1L1	0.269835	0.0141435	-2.92241	-2.84931	-0.684566
VEGFA	0.269835	0.0141553	2.92194	-2.85006	1.2358
SLC25A37	0.270489	0.0142021	2.92008	-2.85306	1.28824
ZNF248	0.27119	0.0142514	-2.91813	-2.8562	-0.599227
AHCTF1	0.272153	0.0143146	-2.91563	-2.86021	-0.605665
ITPR3	0.272305	0.0143441	2.91447	-2.86208	0.420483
NDUFV3	0.272305	0.0143477	2.91433	-2.86231	0.417982
LINC00476	0.272318	0.014361	-2.91381	-2.86314	-0.692127
FMOD	0.272444	0.0143923	2.91258	-2.86512	0.48111
NETO1	0.272444	0.0143929	-2.91255	-2.86515	-0.874994
SELE	0.272444	0.0144054	2.91206	-2.86594	2.61093
INSM1	0.272913	0.0144428	-2.9106	-2.86829	-1.11003
ISG15	0.272945	0.0144774	2.90925	-2.87046	0.689977
SRPX2	0.272945	0.0144912	2.90872	-2.87132	0.661236
TMED2	0.272945	0.0144994	2.9084	-2.87184	0.594474
TRRAP	0.272945	0.0144999	-2.90838	-2.87186	-0.411021
AREG	0.272945	0.0145103	2.90797	-2.87252	0.702246
ZNRF3	0.272945	0.0145254	-2.90738	-2.87346	-2.52747
ELTD1	0.272945	0.0145468	2.90655	-2.87479	1.50841
ZNF680	0.272945	0.0145528	-2.90632	-2.87516	-0.566667
ZNF136	0.272945	0.0145579	-2.90612	-2.87549	-1.04361
ATP1B3	0.273092	0.0146224	2.90363	-2.87949	0.30257
EMILIN2	0.273092	0.0146245	2.90355	-2.87962	0.496685
RAB36	0.273092	0.0146278	-2.90342	-2.87983	-0.365124
MGP	0.273092	0.0146415	2.9029	-2.88067	0.877518
SLC22A1	0.273092	0.014667	2.90192	-2.88225	0.249692
IVD	0.273092	0.0146863	-2.90117	-2.88344	-0.265182
ZYX	0.273092	0.0146904	2.90102	-2.88369	0.960446
HSPE1	0.273092	0.0146965	2.90078	-2.88407	0.650297
CRY2	0.273092	0.0147019	-2.90058	-2.8844	-0.773612
DNLZ	0.273092	0.0147327	2.89939	-2.8863	0.913693
LOC100506860	0.273092	0.0147376	2.89921	-2.8866	0.42976
VNN3	0.273092	0.0147482	2.8988	-2.88726	0.343962
LOC101928306	0.273092	0.0147501	-2.89873	-2.88737	-0.313904
TIAM1	0.273092	0.0147633	-2.89822	-2.88818	-0.463728
FCGR2B	0.273092	0.0147761	2.89773	-2.88897	0.51007
CXCL5	0.273092	0.0147855	2.89738	-2.88954	1.37388
CCDC50	0.273092	0.014796	2.89698	-2.89018	0.578344
TAGLN2	0.273092	0.0147986	2.89688	-2.89034	0.770241
MANF	0.273092	0.0148145	2.89627	-2.89132	1.0212
TYMP	0.273092	0.01483	2.89568	-2.89227	0.818045
CALCA	0.273092	0.0148306	2.89566	-2.8923	0.279085
ZNF607	0.27313	0.0148452	-2.8951	-2.89319	-0.700835
TMEM71	0.273259	0.0148768	2.89391	-2.89512	1.75356
MST4	0.273259	0.0148821	2.8937	-2.89544	0.880245
ADCY5	0.273259	0.0148901	-2.8934	-2.89593	-0.343985
TMOD3	0.273262	0.0149264	2.89203	-2.89813	0.496962
GPR1	0.273262	0.0149307	-2.89187	-2.89839	-0.283397
APRT	0.273262	0.0149331	2.89178	-2.89854	0.576745
BACH2	0.273262	0.0149408	-2.89148	-2.89901	-0.610936
ANAPC11	0.273356	0.0149762	2.89015	-2.90115	0.298339
SPDL1	0.273356	0.014981	-2.88997	-2.90144	-0.772319
DPYSL2	0.273356	0.015	-2.88925	-2.90259	-0.536339
HNRNPAB	0.273356	0.0150161	2.88865	-2.90356	0.449749
TRIM71	0.273356	0.0150192	-2.88853	-2.90375	-0.572137
DPYSL4	0.273356	0.0150277	-2.88821	-2.90426	-0.239742
RP11-373D23.2	0.273356	0.0150343	2.88797	-2.90466	1.76644
ARHGAP30	0.274377	0.0151074	2.88523	-2.90905	0.380066
RC3H2	0.274377	0.0151158	2.88492	-2.90956	0.318876
PTS	0.274622	0.0151419	2.88394	-2.91112	0.667458
RP6-99M1.2	0.275268	0.0152013	2.88174	-2.91466	0.370762
GPR98	0.275268	0.015205	-2.8816	-2.91489	-0.478314
TEF	0.275268	0.0152178	-2.88112	-2.91565	-0.439196
SYNCRIP	0.275268	0.0152418	2.88024	-2.91708	0.337834
COL8A2	0.275268	0.0152572	2.87967	-2.91799	0.413558
PCDH10	0.275268	0.0152618	-2.8795	-2.91826	-1.005
ATRN	0.275268	0.0152801	-2.87882	-2.91935	-0.456302
ZNF814	0.275268	0.0152998	-2.8781	-2.92051	-0.215855
RP11-1008C21.2	0.275268	0.0153012	2.87804	-2.9206	0.25172
ZNF500	0.275268	0.015368	-2.87559	-2.92454	-0.562969
ASAH1	0.275268	0.0153811	2.87511	-2.92531	0.344015
RBM15B	0.275268	0.015383	-2.87504	-2.92543	-0.320746
LOC101926963	0.275268	0.0153835	2.87502	-2.92545	0.322945
PTCH1	0.275268	0.0153858	-2.87493	-2.92559	-0.458336
SDE2	0.275268	0.0153927	2.87468	-2.926	0.713314
CLEC2B	0.275268	0.0154015	2.87436	-2.92651	1.66387
SGK494	0.275268	0.015411	-2.87401	-2.92708	-0.742491
MCOLN1	0.275268	0.0154174	2.87378	-2.92745	0.455301
RBKS	0.275268	0.0154265	2.87344	-2.92798	0.655281
FAM171A1	0.275268	0.0154318	-2.87325	-2.92829	-0.922996
P4HB	0.275346	0.0154489	2.87263	-2.9293	0.783854
APBB1IP	0.276525	0.0155278	2.86975	-2.93391	0.470494
RPL29	0.276555	0.0155422	2.86923	-2.93475	0.903522
USP51	0.276714	0.015564	-2.86844	-2.93602	-0.501753
EMP1	0.277181	0.0156054	2.86694	-2.93842	1.29967
LOC286189	0.277181	0.0156227	-2.86632	-2.93943	-0.801415
SNRPB	0.277181	0.0156286	2.8661	-2.93977	0.848299
NDUFA13	0.277207	0.0156441	2.86555	-2.94067	0.492772
ZNF382	0.277207	0.0156557	-2.86513	-2.94134	-0.40563
VAMP4	0.277332	0.0156767	2.86437	-2.94255	0.469385
MYL12B	0.277332	0.0157243	2.86266	-2.9453	0.738324
HIC2	0.277332	0.0157252	-2.86263	-2.94535	-0.434988
TRAM2	0.277332	0.015735	2.86228	-2.94591	0.405902
NUMB	0.277332	0.0157379	2.86218	-2.94608	0.590706
OSM	0.277332	0.0157476	2.86183	-2.94664	0.802362
CCNB1IP1	0.277332	0.0157544	-2.86159	-2.94703	-0.41553
FNDC3B	0.277332	0.0157652	2.8612	-2.94765	0.435695
LYRM1	0.277645	0.0158071	2.8597	-2.95005	0.543629
CHRDL1	0.277645	0.0158086	-2.85965	-2.95014	-1.6944
CLEC5A	0.277819	0.0158314	2.85884	-2.95144	2.08319
RBM12B	0.27809	0.0158597	-2.85783	-2.95306	-0.713613
IFFO2	0.278162	0.0158766	-2.85723	-2.95402	-0.759782
DFFB	0.27854	0.0159399	-2.85499	-2.95762	-0.971025
LDB2	0.27854	0.0159592	-2.8543	-2.95872	-1.15634
GREB1	0.27854	0.0159597	-2.85429	-2.95875	-0.38194
TIAM2	0.27854	0.0159667	-2.85404	-2.95915	-0.743297
CSPG5	0.27854	0.0159828	-2.85347	-2.96006	-0.991261
CD59	0.27854	0.0159829	2.85347	-2.96006	1.09706
MADD	0.27854	0.0159882	-2.85328	-2.96037	-0.790143
CAPZB	0.278792	0.0160156	2.85231	-2.96191	0.336642
ZNF684	0.278811	0.0160393	-2.85148	-2.96325	-0.291198
SALL3	0.278811	0.0160424	-2.85137	-2.96343	-0.737758
PRB3	0.279045	0.0160923	2.84962	-2.96624	0.225278
GRIN2C	0.279045	0.0160964	-2.84948	-2.96647	-0.412864
ZNF121	0.279045	0.0161233	-2.84854	-2.96798	-0.504203
TNRC6B	0.279045	0.0161345	-2.84814	-2.96861	-0.578514
ZNF503-AS1	0.279045	0.0161479	2.84768	-2.96936	0.203183
REN	0.279045	0.0161531	-2.8475	-2.96965	-0.293181
CTSS	0.279045	0.0161548	2.84744	-2.96975	1.03032
SLC30A3	0.279045	0.016159	-2.84729	-2.96998	-0.898523
CHP1	0.279204	0.0161909	2.84618	-2.97177	0.503515
PDE4B	0.279204	0.016194	2.84607	-2.97194	0.430987
CLIC1	0.279577	0.0162285	2.84487	-2.97387	1.76283
IPO7	0.279756	0.0162749	2.84326	-2.97645	0.264249
NUCB2	0.279756	0.016288	2.8428	-2.97718	0.415679
DFNA5	0.279756	0.0162928	2.84264	-2.97744	0.806911
PPAPDC2	0.279756	0.0163013	-2.84235	-2.97791	-0.884379
CASQ2	0.279756	0.0163035	2.84227	-2.97804	0.701197
MS4A14	0.280166	0.0163403	2.841	-2.98008	0.455122
MAPKBP1	0.280296	0.0163609	-2.84029	-2.98122	-0.341549
WAS	0.280387	0.0163791	2.83966	-2.98223	0.319578
CDK2AP2	0.280638	0.0164206	2.83823	-2.98451	0.702677
KIR2DL2	0.280638	0.0164346	2.83776	-2.98528	0.420856
FXYD6	0.280638	0.0164363	-2.8377	-2.98538	-1.482
C12orf65	0.280638	0.0164644	-2.83673	-2.98692	-0.310004
PF4V1	0.280638	0.0164801	2.8362	-2.98779	0.266702
U2AF1L4	0.280638	0.0164842	2.83606	-2.98801	0.39831
KRT23	0.280638	0.0164845	2.83604	-2.98803	0.266881
ZNF2	0.281621	0.0165553	-2.83363	-2.9919	-0.606233
MAP3K12	0.282284	0.0166073	-2.83186	-2.99474	-0.260644
AMBRA1	0.282778	0.01665	-2.83041	-2.99707	-0.260951
RTFDC1	0.282778	0.0166697	2.82974	-2.99814	0.531584
TNFRSF18	0.282778	0.0166885	2.82911	-2.99915	0.177728
RBM48	0.282778	0.0166886	-2.82911	-2.99916	-0.331147
PROSER1	0.282892	0.0167151	-2.82821	-3.0006	-0.31528
MYOF	0.282892	0.0167214	2.828	-3.00094	0.897355
ABCF1	0.283097	0.0167532	2.82693	-3.00266	0.419901
SLK	0.283097	0.0167597	-2.82671	-3.00301	-0.37579
ASXL3	0.283642	0.016805	-2.82519	-3.00545	-0.439762
HLA-F-AS1	0.283955	0.0168367	2.82413	-3.00715	0.28497
SLC10A3	0.284372	0.0168764	2.8228	-3.00928	0.577085
RP1-39G22.7	0.284372	0.0168876	-2.82242	-3.00989	-0.553894
PIRT	0.284384	0.0169015	-2.82196	-3.01063	-1.22996
TARS	0.284507	0.0169253	2.82117	-3.0119	0.55498
AFG3L2	0.284507	0.0169594	-2.82003	-3.01372	-0.404491
ARL8B	0.284507	0.0169606	2.81999	-3.01378	0.781241
GTF2E1	0.284507	0.0169677	-2.81976	-3.01416	-0.416357
ATP5E	0.284507	0.0169812	2.81931	-3.01488	0.619174
ITGAL	0.284507	0.0169877	2.81909	-3.01523	0.442236
ABCG1	0.284893	0.0170238	-2.81789	-3.01715	-0.819872
GNA13	0.285151	0.0170524	2.81695	-3.01867	1.00526
SLC7A9	0.285201	0.0170686	-2.81641	-3.01953	-0.341107
ZNF217	0.285498	0.0171053	2.8152	-3.02147	0.481887
TGFBR2	0.285498	0.0171281	2.81445	-3.02267	0.721622
MIR4435-1HG	0.285498	0.0171336	2.81427	-3.02296	0.424333
OBSL1	0.285498	0.0171397	-2.81407	-3.02329	-0.413435
SNUPN	0.285498	0.0171588	-2.81344	-3.02429	-0.388636
NINL	0.285498	0.0171709	-2.81304	-3.02493	-1.25004
NUMBL	0.285498	0.0171787	-2.81279	-3.02534	-0.445643
ATP6V0E2-AS1	0.286032	0.017224	-2.8113	-3.02772	-0.415194
GZMK	0.286515	0.0172663	2.80992	-3.02994	0.380315
MAD2L2	0.286944	0.0173086	2.80854	-3.03215	1.17348
PBX1	0.286944	0.0173187	-2.80821	-3.03268	-0.592331
RALA	0.287086	0.0173405	2.8075	-3.03382	0.724795
HLA-DPA1	0.287471	0.0173771	2.80632	-3.03572	1.40078
SOX12	0.287538	0.0173945	-2.80575	-3.03663	-0.471768
IL2RB	0.287538	0.0174111	2.80521	-3.03749	0.481955
KLHL21	0.287538	0.0174209	-2.8049	-3.038	-0.613696
GTSF1	0.287762	0.0174478	2.80403	-3.03939	0.471969
GPR183	0.287968	0.0174736	2.80319	-3.04073	1.22808
CCSAP	0.288153	0.0174981	-2.8024	-3.042	-0.259089
EMC6	0.288299	0.0175203	2.80169	-3.04314	0.38299
C8orf37	0.288314	0.0175345	-2.80123	-3.04388	-0.546894
SUPV3L1	0.288552	0.0175623	-2.80034	-3.04531	-0.69336
MYL6	0.288629	0.0175803	2.79976	-3.04623	0.597515
ACTR2	0.288734	0.0176041	2.799	-3.04746	0.361836
LDOC1	0.288734	0.017616	-2.79862	-3.04807	-0.818326
IRF1	0.288734	0.017642	2.79778	-3.0494	0.840021
ZNF492	0.288734	0.0176523	-2.79745	-3.04993	-0.232645
RGS2	0.288734	0.0176534	2.79742	-3.04998	1.58586
HELZ2	0.288736	0.0176701	2.79689	-3.05084	0.231953
FOSL1	0.288736	0.0176835	2.79646	-3.05153	1.52136
NEGR1	0.288736	0.0177012	-2.7959	-3.05243	-1.40837
FAM60A	0.288736	0.0177069	2.79572	-3.05272	0.61473
RP11-403P17.3	0.28893	0.0177321	-2.79491	-3.054	-0.652379
CD80	0.288974	0.0177532	2.79424	-3.05508	0.22857
SLC6A16	0.288974	0.0177789	-2.79343	-3.05639	-0.301494
CTDSPL	0.288974	0.01778	-2.79339	-3.05644	-0.293516
IMP4	0.288974	0.0177932	2.79298	-3.05711	0.605467
ATMIN	0.288974	0.0178103	-2.79243	-3.05798	-0.448555
MGC45800	0.288974	0.017819	-2.79216	-3.05843	-0.400743
ILF2	0.288974	0.0178282	2.79187	-3.05889	0.641189
LOC101927943	0.289152	0.0178525	-2.7911	-3.06012	-0.346622
LOC101927124	0.289709	0.0179196	-2.78898	-3.06351	-0.218117
PYGO2	0.289709	0.0179259	-2.78878	-3.06383	-0.30966
ZFP14	0.289709	0.0179343	-2.78852	-3.06425	-0.457653
ATF3	0.289709	0.017948	2.78809	-3.06494	1.18267
ZNF367	0.289709	0.0179552	2.78786	-3.06531	1.23544
ZBTB34	0.289709	0.0179672	-2.78749	-3.06591	-0.57063
ELSPBP1	0.289877	0.017991	-2.78674	-3.0671	-0.201631
NEDD9	0.290587	0.0180485	2.78494	-3.06999	0.727946
GDF11	0.290886	0.018084	2.78384	-3.07176	0.35874
KBTBD7	0.290886	0.0181052	-2.78317	-3.07282	-1.13711
TRIM16	0.290886	0.0181073	2.78311	-3.07293	0.618738
TCEAL3	0.291136	0.0181555	-2.78161	-3.07533	-0.242905
SPINK4	0.291136	0.0181657	2.78129	-3.07584	0.202872
SMDT1	0.291136	0.018176	2.78097	-3.07635	0.259095
ZNF530	0.291136	0.0181767	-2.78095	-3.07638	-0.335022
RBM18	0.291353	0.018205	-2.78007	-3.07779	-0.493308
PEMT	0.291353	0.0182362	2.77911	-3.07934	0.46482
LQFBS-1	0.291353	0.0182483	-2.77874	-3.07994	-0.516561
MAPKAPK3	0.291353	0.0182536	2.77857	-3.0802	0.677961
CTA-384D8.35	0.291353	0.0182575	2.77845	-3.08039	0.222951
GBP5	0.291633	0.0182993	2.77716	-3.08246	0.352933
FAM161A	0.291633	0.0183037	-2.77702	-3.08268	-0.399475
MGC12916	0.291633	0.0183154	2.77666	-3.08326	0.273846
CYB5R2	0.292029	0.018364	2.77517	-3.08565	2.14213
IFRD2	0.292029	0.0183714	2.77494	-3.08601	0.670972
TOMM22	0.292029	0.0183808	2.77466	-3.08647	0.434067
KIAA0430	0.292167	0.0184207	-2.77343	-3.08843	-0.316612
METTL14	0.292167	0.0184224	-2.77338	-3.08851	-0.595493
ZNRF2P1	0.292167	0.0184395	2.77286	-3.08936	0.503771
SERPINB2	0.292167	0.0184434	2.77274	-3.08955	1.00879
SCAPER	0.292278	0.018469	-2.77195	-3.0908	-0.452391
PPOX	0.292278	0.0184774	-2.7717	-3.09121	-0.539736
PHEX	0.292611	0.0185681	2.76894	-3.09563	0.391922
MLKL	0.292611	0.018582	2.76852	-3.09631	0.996288
CLDN6	0.292611	0.018593	2.76818	-3.09684	0.176589
SFRP4	0.292611	0.0186167	2.76746	-3.09799	0.609408
LTB4R2	0.292611	0.0186305	2.76705	-3.09866	0.279459
LINC00957	0.292611	0.0186356	-2.76689	-3.09891	-0.434866
SORCS2	0.292611	0.0186413	-2.76672	-3.09919	-1.14062
PSMB6	0.292611	0.0186483	2.76651	-3.09952	0.51199
C19orf70	0.292611	0.0186555	2.76629	-3.09987	0.501454
WIPF2	0.292611	0.0186566	-2.76626	-3.09992	-0.569459
ZNF615	0.292611	0.0186603	-2.76615	-3.1001	-0.708401
ERCC3	0.292611	0.0186606	-2.76614	-3.10012	-0.419797
CCDC62	0.292901	0.0186926	-2.76517	-3.10167	-0.396351
ARNTL2	0.293485	0.0187434	2.76364	-3.10412	0.679614
CNN2	0.293776	0.0187756	2.76267	-3.10567	0.623686
RPL35	0.294072	0.0188081	2.7617	-3.10723	0.894377
CSNK1A1	0.294103	0.0188237	2.76123	-3.10798	0.413316
RP11-258C19.7	0.294238	0.0188459	-2.76056	-3.10904	-0.788953
ADAM8	0.2955	0.0189406	2.75774	-3.11357	0.909826
RP1	0.2955	0.0189776	2.75664	-3.11533	0.191489
AMOT	0.2955	0.0189816	-2.75652	-3.11552	-0.36886
SEC61G	0.2955	0.0189968	2.75607	-3.11625	0.894522
HACE1	0.2955	0.0189979	-2.75603	-3.1163	-0.453976
COL11A1	0.2955	0.0190086	-2.75572	-3.11681	-0.445101
AKAP11	0.295851	0.0190739	-2.75378	-3.1199	-0.469122
KREMEN2	0.295851	0.0190826	2.75353	-3.12031	0.358891
ZNF785	0.295851	0.0190928	-2.75323	-3.12079	-0.560692
AKAP12	0.295851	0.0190983	2.75306	-3.12106	1.78858
CRADD	0.295851	0.0190995	2.75303	-3.12111	0.540117
RP4-595K12.1	0.296084	0.0191282	2.75218	-3.12247	0.87093
GSR	0.296335	0.0191581	2.7513	-3.12388	0.41705
C2CD2L	0.297426	0.0192593	-2.74833	-3.12863	-0.342219
GTPBP2	0.297426	0.0192633	2.74821	-3.12882	0.340423
STC2	0.297426	0.0192699	2.74802	-3.12913	0.775974
CSF2RA	0.297861	0.0193118	2.74679	-3.13109	0.300611
FAU	0.29787	0.0193348	2.74612	-3.13216	0.677731
RNF139-AS1	0.29787	0.0193436	-2.74587	-3.13258	-0.34186
ESYT2	0.29787	0.0193536	2.74557	-3.13304	0.489628
PAPLN	0.297942	0.0193827	-2.74473	-3.1344	-0.81398
C12orf45	0.297942	0.0193977	2.74429	-3.1351	0.41943
ANKRD49	0.297942	0.0194127	-2.74386	-3.13579	-0.495967
ARHGDIB	0.297942	0.0194133	2.74384	-3.13582	0.865896
RPF2	0.29911	0.0195033	2.74123	-3.14	0.633259
TRIM24	0.299359	0.019539	-2.7402	-3.14165	-0.726716
RAB40C	0.299359	0.0195471	-2.73996	-3.14202	-0.404574
CYP20A1	0.299391	0.019578	2.73907	-3.14345	0.634803
WIPI1	0.299391	0.0195825	2.73894	-3.14366	0.579835
DCBLD1	0.299391	0.0195907	-2.73871	-3.14403	-1.00928
MEDAG	0.299466	0.0196291	2.7376	-3.1458	0.581638
DOPEY1	0.299466	0.0196366	-2.73739	-3.14615	-0.353109
PNO1	0.299466	0.0196553	2.73685	-3.147	0.547344
ZC3H12B	0.299466	0.019656	-2.73683	-3.14703	-0.397578
FOLR3	0.299466	0.0196648	2.73658	-3.14744	0.316856
ARX	0.299737	0.0197061	-2.73539	-3.14933	-1.16203
LST1	0.299737	0.0197102	2.73528	-3.14952	0.443581
RBPMS	0.300089	0.0197473	2.73422	-3.15122	0.430539
DBR1	0.300252	0.0197719	-2.73352	-3.15234	-0.545355
XYLT1	0.301053	0.0198385	-2.73162	-3.15538	-0.599882
ZNF398	0.30116	0.0198699	-2.73073	-3.1568	-0.334684
RRN3P2	0.30116	0.019888	2.73021	-3.15763	1.11573
BBS9	0.30116	0.0198929	-2.73007	-3.15785	-0.355951
ERCC1	0.30116	0.0199011	2.72984	-3.15822	0.762145
PHC2	0.301173	0.0199159	2.72942	-3.15889	0.88476
GNAQ	0.301453	0.0199484	-2.7285	-3.16036	-0.244813
TXNL4B	0.301517	0.0199941	2.72721	-3.16242	0.594709
RP11-722E23.2	0.301517	0.0200089	-2.7268	-3.16309	-0.808961
LOC285191	0.301517	0.0200483	2.72569	-3.16486	0.315959
KCNJ15	0.301517	0.0200824	2.72473	-3.1664	0.323259
DOCK2	0.301517	0.0201072	2.72403	-3.16751	0.685789
F11R	0.301517	0.0201143	2.72383	-3.16783	0.863311
UBE2H	0.301517	0.0201259	2.72351	-3.16835	0.286716
CCDC47	0.301517	0.0201565	2.72265	-3.16972	0.378503
RHOH	0.301517	0.0201733	2.72218	-3.17047	1.02123
PPARD	0.301517	0.0201789	2.72202	-3.17072	0.38682
BCL7C	0.301517	0.0201801	2.72199	-3.17078	0.55603
SEC61A1	0.301517	0.020182	2.72194	-3.17086	0.605706
GAPDHS	0.301517	0.0201986	2.72147	-3.1716	0.22395
FRAT1	0.301517	0.0202035	-2.72134	-3.17182	-1.05098
NUPL1	0.301517	0.0202051	2.72129	-3.17189	0.747741
SMAD1	0.301517	0.0202206	-2.72086	-3.17259	-0.974809
RP11-272D12.1	0.301517	0.0202264	2.7207	-3.17285	0.278714
CLEC2D	0.301517	0.0202355	2.72044	-3.17325	0.179065
OVGP1	0.301517	0.0202375	-2.72039	-3.17334	-0.405013
TENM1	0.301517	0.0202466	-2.72013	-3.17375	-0.887044
CD3E	0.301517	0.0202519	2.71999	-3.17398	0.230284
ZNF689	0.301517	0.0202611	-2.71973	-3.17439	-0.451893
SHISA7	0.301517	0.0202729	-2.7194	-3.17491	-0.284611
RCAN1	0.302022	0.0203326	2.71774	-3.17757	0.80485
TNFSF15	0.302022	0.0203347	2.71768	-3.17766	0.540178
GDI2	0.302217	0.0203618	2.71693	-3.17886	0.441525
DSTYK	0.302428	0.0204024	-2.71581	-3.18066	-0.523195
GOLT1B	0.302428	0.0204039	2.71577	-3.18072	0.579151
RP11-381P6.1	0.302517	0.0204239	2.71522	-3.18161	0.199378
RUSC2	0.302741	0.0204581	-2.71427	-3.18311	-0.524098
AMICA1	0.302741	0.020467	2.71403	-3.18351	0.473418
HSPA1L	0.302826	0.0204867	2.71348	-3.18438	0.539492
IL7R	0.303344	0.0205358	2.71213	-3.18653	1.53204
RP1-178F10.1	0.303437	0.0205746	-2.71107	-3.18824	-0.34164
RP11-271C24.3	0.303437	0.0206022	2.71031	-3.18945	1.2459
HSPA5	0.303437	0.0206255	2.70968	-3.19046	0.947496
PEAR1	0.303437	0.0206317	2.70951	-3.19073	0.493591
LOC101927703	0.303437	0.0206321	2.7095	-3.19075	0.285215
MYZAP	0.303437	0.0206593	-2.70875	-3.19194	-0.346549
AHCY	0.303437	0.0206649	2.7086	-3.19219	0.617644
NEK5	0.303437	0.0206707	-2.70844	-3.19244	-0.730763
TBL1XR1	0.303437	0.0206776	-2.70825	-3.19274	-0.339424
PSIP1	0.303437	0.0206826	-2.70811	-3.19296	-0.384781
FLJ31715	0.303437	0.020715	2.70723	-3.19437	0.488465
ZNF585A	0.303437	0.0207211	-2.70707	-3.19463	-0.484678
HSBP1	0.303437	0.0207385	2.70659	-3.19539	0.45747
CDK13	0.303437	0.0207482	-2.70633	-3.19581	-0.306495
ZNF432	0.303437	0.0207523	-2.70622	-3.19599	-0.735876
AATF	0.303521	0.020772	2.70568	-3.19685	0.656673
MAP3K7CL	0.303925	0.0208137	2.70455	-3.19865	0.489622
IL4I1	0.30401	0.0208335	2.70401	-3.19951	0.744894
REL	0.304781	0.0209005	2.7022	-3.2024	1.11444
DMD	0.305613	0.0209717	-2.70028	-3.20547	-0.270687
ZNF674-AS1	0.305613	0.0209858	2.69991	-3.20608	0.512504
NLRP3	0.305841	0.0210155	2.69911	-3.20735	1.17538
MLEC	0.306689	0.021088	2.69716	-3.21045	0.26659
EIF4G2	0.30671	0.0211036	2.69675	-3.21112	0.225396
PTGER4	0.307164	0.0211788	2.69474	-3.21433	0.91939
BTNL3	0.307164	0.0211825	2.69464	-3.21449	0.289983
PFKFB4	0.307164	0.0211873	2.69451	-3.21469	0.461195
ASCL1	0.307164	0.0211916	-2.6944	-3.21487	-0.575558
SETDB2	0.307908	0.0212571	-2.69266	-3.21765	-0.252983
PRDM2	0.308013	0.0212786	-2.69209	-3.21856	-0.411943
MUT	0.308052	0.0212955	-2.69164	-3.21928	-0.563887
EPSTI1	0.308172	0.021318	2.69104	-3.22023	0.425615
LOC101928762	0.308339	0.0213438	2.69036	-3.22132	0.795698
CD2	0.309115	0.0214161	2.68845	-3.22437	0.941219
APOL6	0.309115	0.0214261	-2.68819	-3.22479	-0.307541
MTRF1L	0.309116	0.0214711	2.687	-3.22668	0.346541
ZNF252P-AS1	0.309116	0.0214982	-2.68629	-3.22782	-0.227188
GJD2	0.309116	0.0215039	2.68614	-3.22806	0.26209
B3GNT7	0.309116	0.0215072	-2.68606	-3.22819	-0.473686
CA1	0.309116	0.021514	2.68588	-3.22848	0.283183
MBD1	0.309116	0.0215233	2.68564	-3.22887	0.191299
IFRD1	0.309116	0.0215305	2.68545	-3.22917	0.943689
RYR1	0.309116	0.0215543	-2.68482	-3.23017	-0.590378
NTN4	0.309116	0.0215546	-2.68482	-3.23018	-1.60111
SUV420H1	0.309356	0.0215856	-2.684	-3.23147	-0.450514
TERF2IP	0.309417	0.0216042	-2.68352	-3.23225	-0.447484
SMIM10	0.309436	0.0216198	2.68311	-3.2329	0.298464
CFLAR	0.309506	0.021639	2.68261	-3.2337	0.38095
ACTB	0.309687	0.0216681	2.68185	-3.23491	0.362297
FAM19A5	0.309687	0.0216898	-2.68129	-3.23581	-0.76456
CD151	0.309687	0.0216945	2.68116	-3.23601	0.371901
KRTAP4-2	0.310387	0.0217678	2.67926	-3.23904	0.217741
KIR2DS5	0.310387	0.0217984	2.67847	-3.24031	0.342899
NF1	0.310387	0.0217993	2.67844	-3.24035	0.406381
IKBIP	0.310387	0.0218009	2.6784	-3.24041	0.378115
ZNF569	0.31086	0.0218485	-2.67717	-3.24238	-0.407901
CDC42EP5	0.311069	0.0218868	2.67618	-3.24395	0.463843
KIAA1751	0.311069	0.0218919	-2.67605	-3.24416	-0.18395
HIPK4	0.311583	0.0219525	2.67449	-3.24665	0.206405
C14orf166	0.311583	0.0219763	2.67388	-3.24763	0.588362
WT1-AS	0.311583	0.0219793	2.67381	-3.24775	0.248631
AFAP1	0.311583	0.0219879	-2.67358	-3.2481	-0.528398
ZNF839	0.311583	0.0220071	-2.67309	-3.24889	-0.337478
PPP2R1B	0.311583	0.0220144	2.6729	-3.24919	0.572309
FMR1	0.311745	0.0220402	-2.67224	-3.25025	-0.282435
AK055458	0.311798	0.0220593	-2.67175	-3.25102	-0.220307
N4BP1	0.311798	0.0220728	-2.67141	-3.25157	-0.3789
CYBA	0.311859	0.0220915	2.67093	-3.25234	0.476052
ODF3B	0.312057	0.022124	2.6701	-3.25366	0.188542
GRID1	0.312057	0.0221343	-2.66984	-3.25408	-0.50186
GBX2	0.312283	0.0221648	2.66906	-3.25532	0.203955
MCL1	0.31257	0.0221996	2.66818	-3.25673	0.717118
KIAA0368	0.31271	0.0222474	-2.66696	-3.25867	-0.558801
ZNF362	0.31271	0.0222523	-2.66684	-3.25887	-0.29199
NFKB1	0.31271	0.0222529	2.66682	-3.25889	0.465068
TECTA	0.313393	0.0223236	-2.66503	-3.26175	-0.223491
NBEAL1	0.313393	0.0223339	2.66477	-3.26216	0.565596
PET112	0.313393	0.0223462	-2.66446	-3.26266	-0.666464
CTC1	0.313393	0.0223638	2.66402	-3.26337	0.31513
NECAP2	0.313393	0.0223738	2.66376	-3.26377	0.498964
VAPA	0.313459	0.022393	-2.66328	-3.26454	-0.335669
PHLDA2	0.313633	0.02243	2.66235	-3.26603	0.658104
MSTO1	0.313633	0.0224414	2.66206	-3.26649	0.350406
EMP3	0.313633	0.0224533	2.66176	-3.26696	1.30541
SUCNR1	0.313633	0.0224634	2.66151	-3.26737	0.234507
YKT6	0.314142	0.0225144	2.66023	-3.26941	0.560497
SLC35D1	0.31415	0.0225295	-2.65985	-3.27001	-0.429636
COX6B1	0.31415	0.022544	2.65949	-3.27059	0.240365
CXADR	0.31435	0.0226027	2.65802	-3.27293	0.81977
B3GNT1	0.31435	0.0226403	-2.65708	-3.27443	-0.521831
TNFAIP8	0.31435	0.0226616	2.65655	-3.27528	1.16787
SLC16A10	0.31435	0.0226633	2.65651	-3.27534	0.762811
STARD3NL	0.31435	0.0226783	2.65613	-3.27594	0.429712
CHTF8	0.31435	0.0226802	-2.65608	-3.27602	-0.356744
LTBP2	0.31435	0.022687	2.65592	-3.27628	0.441038
INSL3	0.31435	0.0226976	2.65565	-3.27671	0.201946
EID1	0.31435	0.0227015	-2.65555	-3.27686	-0.288435
GOLGB1	0.31435	0.0227034	-2.65551	-3.27694	-0.39643
YES1	0.314383	0.0227227	2.65503	-3.2777	0.534978
DOCK1	0.314383	0.0227349	2.65473	-3.27818	0.745544
DHX33	0.314614	0.0227661	-2.65395	-3.27942	-0.550246
VEGFC	0.314691	0.0227862	2.65345	-3.28021	0.932725
AARS	0.315252	0.0228559	-2.65173	-3.28296	-0.378549
ZNF420	0.315252	0.022856	-2.65173	-3.28296	-0.773752
MBD2	0.31538	0.0228841	2.65103	-3.28407	0.706242
CA2	0.31538	0.0229006	2.65063	-3.28472	1.12103
LUM	0.31538	0.0229113	2.65036	-3.28514	0.432592
PCDH1	0.31538	0.0229235	2.65006	-3.28562	0.252871
GMFG	0.315502	0.0229469	2.64948	-3.28654	1.15256
ZADH2	0.315588	0.0229913	-2.64839	-3.28827	-0.485083
PPIC	0.315588	0.0229948	2.64831	-3.28841	0.582679
METTL1	0.315588	0.0229969	2.64826	-3.2885	0.703791
TMEM132C	0.315698	0.0230195	-2.6477	-3.28938	-0.872809
RPL14	0.315961	0.0230533	2.64687	-3.2907	0.566262
SLC35B4	0.315997	0.0230705	-2.64645	-3.29137	-0.785187
UBQLN1	0.316061	0.0230898	2.64598	-3.29212	0.599192
TSC22D3	0.316177	0.0231358	2.64486	-3.29391	0.283728
GPATCH4	0.316177	0.0231377	2.64481	-3.29399	0.289056
BOLA3	0.316177	0.023142	2.64471	-3.29415	0.856845
XXyac-YX155B6.7	0.316352	0.0231706	-2.64401	-3.29526	-0.486289
CABLES2	0.316352	0.023184	-2.64368	-3.29579	-0.635713
SETBP1	0.316408	0.0232027	-2.64322	-3.29651	-1.21783
LOC102723526	0.316868	0.0232512	2.64205	-3.29839	0.269945
KLHL2	0.316988	0.0232809	-2.64133	-3.29954	-0.5869
KYNU	0.316988	0.0232951	2.64098	-3.30009	0.67955
RBM8A	0.316988	0.0233039	2.64077	-3.30042	0.357414
MS4A4A	0.31748	0.0233547	2.63954	-3.30238	1.12772
IRS2	0.317756	0.0233897	-2.63869	-3.30373	-1.05837
PUM1	0.317774	0.023411	-2.63818	-3.30455	-0.526453
LRP4	0.317774	0.0234305	-2.63771	-3.3053	-0.762646
TGFB1	0.317774	0.0234367	2.63756	-3.30554	0.247647
PARP16	0.317774	0.0234496	-2.63725	-3.30603	-0.570119
FZD3	0.318003	0.0234951	-2.63615	-3.30778	-1.6298
TMEM170B	0.318003	0.023496	-2.63613	-3.30781	-1.54805
INHBA	0.318043	0.0235306	2.6353	-3.30913	1.71168
PAICS	0.318043	0.0235365	2.63516	-3.30936	0.600712
CXCR2	0.318043	0.0235451	2.63495	-3.30969	0.361464
PTCSC1	0.318043	0.0235576	2.63465	-3.31017	0.209017
STPG1	0.318384	0.0235976	-2.6337	-3.31169	-0.345907
FTO	0.31858	0.0236327	-2.63286	-3.31303	-0.411952
CRAMP1L	0.31858	0.0236416	-2.63264	-3.31336	-0.230452
S100P	0.318606	0.0236582	2.63225	-3.314	2.36244
CACNA1I	0.318764	0.0236847	-2.63162	-3.315	-0.539508
IER3	0.318895	0.0237091	2.63103	-3.31593	1.82448
SLC16A6	0.319106	0.0237435	2.63021	-3.31723	1.32754
FLVCR1	0.319106	0.0237724	-2.62953	-3.31833	-0.475163
CDCA3	0.319106	0.0237775	-2.62941	-3.31852	-0.214903
BLOC1S4	0.319106	0.0237838	-2.62926	-3.31876	-0.560042
RGS3	0.31931	0.0238347	2.62805	-3.32068	0.715534
LOC102724870	0.31931	0.0238361	-2.62801	-3.32073	-0.703047
FICD	0.31931	0.0238497	2.62769	-3.32125	0.606495
NCOA1	0.31931	0.0238713	-2.62718	-3.32206	-0.499462
SPCS2	0.31931	0.0238957	2.62661	-3.32298	0.306727
GNA15	0.31931	0.0239099	2.62627	-3.32351	1.52988
KAT6B	0.31931	0.0239157	-2.62613	-3.32373	-0.498405
MYRFL	0.31931	0.0239169	2.6261	-3.32378	0.226223
NRM	0.319492	0.0239693	2.62487	-3.32574	0.540059
SS18L1	0.319492	0.023972	-2.6248	-3.32584	-0.527012
AOC3	0.319492	0.0239858	2.62448	-3.32636	0.341942
CD163	0.319492	0.0239896	2.62439	-3.3265	2.09025
IKZF2	0.31972	0.0240221	-2.62362	-3.32772	-0.481296
NUDT19	0.31972	0.0240428	-2.62314	-3.32849	-0.658079
CAND2	0.31972	0.0240588	-2.62276	-3.3291	-0.537098
LGR4	0.31972	0.0240657	-2.6226	-3.32935	-0.27333
LOC100507507	0.319896	0.0240951	2.62191	-3.33045	0.297068
SLC1A5	0.319896	0.0241085	2.6216	-3.33095	0.351543
SH3RF3	0.319949	0.0241273	-2.62116	-3.33165	-0.69709
ZNF275	0.320531	0.024186	-2.61978	-3.33383	-0.442318
PRKD1	0.320668	0.0242175	-2.61905	-3.33501	-0.246284
C8orf60	0.320668	0.024231	2.61873	-3.33551	0.515189
TFAP2D	0.320668	0.0242481	2.61834	-3.33614	0.342814
LOC100132057	0.320668	0.0242755	-2.6177	-3.33716	-0.226312
CLN3	0.320668	0.0242839	2.6175	-3.33747	0.293935
RP11-227D13.1	0.320668	0.0242852	-2.61747	-3.33751	-0.211804
CARD11	0.320719	0.0243246	2.61656	-3.33897	0.358346
CSF3	0.320719	0.0243261	2.61652	-3.33903	0.889804
MOP-1	0.320719	0.0243334	2.61635	-3.3393	0.25567
NANP	0.320991	0.0243689	-2.61553	-3.34061	-1.07362
FAM78B	0.321061	0.0244026	-2.61475	-3.34185	-0.578949
TRPM4	0.321061	0.0244156	2.61445	-3.34233	0.480349
ELF4	0.321061	0.0244188	2.61437	-3.34244	0.838291
AGAP4	0.321068	0.0244341	-2.61402	-3.34301	-0.918695
ASAP3	0.321856	0.0245106	-2.61225	-3.34581	-0.335101
GSDMC	0.321856	0.0245238	2.61195	-3.3463	0.286718
SLC25A51	0.322125	0.0245592	2.61113	-3.3476	0.683132
TNRC6C	0.322246	0.0245832	-2.61058	-3.34848	-0.330861
ARHGAP9	0.32278	0.0246389	2.6093	-3.35051	0.770719
CEP250	0.323055	0.0246867	2.60821	-3.35225	0.195878
FAM83D	0.323055	0.0246897	-2.60814	-3.35236	-0.779541
UBR3	0.323061	0.0247051	-2.60779	-3.35292	-0.349229
GK	0.32323	0.024733	2.60715	-3.35393	0.551776
EVI2B	0.32327	0.0247509	2.60674	-3.35458	1.17353
DNAJB5	0.323335	0.0247744	2.6062	-3.35544	0.957612
WDR24	0.323335	0.0247915	-2.60581	-3.35606	-0.381725
ADAMTS9-AS2	0.323335	0.0248114	-2.60536	-3.35678	-0.192046
RAP1B	0.323335	0.0248156	2.60526	-3.35693	0.423641
RRP9	0.323399	0.0248355	2.60481	-3.35765	0.460937
LAMTOR1	0.323752	0.0248775	2.60386	-3.35917	0.562712
KLRD1	0.32436	0.0249396	2.60245	-3.3614	0.342809
NCF4	0.32436	0.0249579	2.60203	-3.36207	0.606614
CXXC1P1	0.32436	0.024989	-2.60133	-3.36318	-0.239509
IKZF4	0.32436	0.0249995	-2.60109	-3.36356	-0.335271
FBXO18	0.32436	0.0250088	2.60088	-3.3639	0.199758
HPS1	0.32436	0.0250141	2.60076	-3.36409	0.215531
ALG3	0.324527	0.0250481	2.6	-3.3653	0.382175
PPM1B	0.324527	0.025057	-2.59979	-3.36562	-0.849593
C12orf66	0.325063	0.0251134	-2.59852	-3.36764	-0.652743
GSTP1	0.325136	0.0251455	2.5978	-3.36879	0.60744
CIB1	0.325136	0.0251491	2.59772	-3.36892	0.754077
DENND2D	0.32521	0.0251872	2.59686	-3.37028	0.347044
CHCHD2	0.32521	0.0251904	2.59679	-3.37039	0.592021
GPR150	0.32521	0.0251999	-2.59658	-3.37073	-0.294251
TMEM51	0.325752	0.0252569	2.5953	-3.37276	0.703135
GPX4	0.326609	0.0253384	2.59348	-3.37565	0.31815
FAM189A2	0.326635	0.025362	-2.59295	-3.37649	-1.1113
C1orf213	0.326635	0.0253706	-2.59276	-3.37679	-0.803281
RP1-58B11.1	0.32672	0.0253923	2.59228	-3.37756	0.254424
MMP24-AS1	0.326805	0.0254209	2.59164	-3.37857	0.581555
ITGB2-AS1	0.326805	0.0254291	2.59146	-3.37886	0.544475
SSR1	0.326962	0.0254563	2.59086	-3.37982	0.400138
FAM90A1	0.327012	0.0254754	-2.59043	-3.38049	-0.293425
RAB33B	0.327729	0.0255464	-2.58886	-3.38299	-0.582383
FAM193B	0.32827	0.025616	2.58732	-3.38544	0.837688
FAM210B	0.32827	0.025634	2.58693	-3.38607	0.531692
PRKAR1A	0.32827	0.025634	2.58692	-3.38607	0.378121
THOC6	0.328674	0.0256808	2.58589	-3.3877	0.422538
PDK2	0.328908	0.0257142	-2.58516	-3.38887	-0.299235
ADD1	0.329096	0.0257441	-2.5845	-3.38992	-0.382229
ZNF324	0.32916	0.0257643	-2.58406	-3.39062	-0.365296
TOMM5	0.329388	0.0258008	2.58326	-3.39189	0.713999
UTP11L	0.329388	0.0258135	2.58298	-3.39233	0.356429
ZIC1	0.329388	0.0258296	-2.58263	-3.39289	-0.898402
SENP2	0.329388	0.025843	-2.58233	-3.39336	-0.260959
PCDH17	0.329587	0.0258738	-2.58166	-3.39443	-0.567639
DARS	0.330331	0.0259653	2.57967	-3.39759	0.543146
LPAR2	0.330331	0.0259727	2.5795	-3.39785	0.382181
ANKRD33	0.330331	0.025978	2.57939	-3.39803	0.232171
LRRFIP1	0.330401	0.0259987	2.57894	-3.39875	0.594279
C17orf51	0.331042	0.0260778	-2.57722	-3.40147	-0.415517
EIF3D	0.331042	0.0260798	2.57718	-3.40154	0.702205
LOC100379224	0.331813	0.0261559	-2.57553	-3.40416	-0.482082
ACSL5	0.332103	0.0261941	2.5747	-3.40547	1.37695
STX4	0.332171	0.0262147	2.57426	-3.40617	0.911039
TMEM132B	0.332276	0.0262384	-2.57375	-3.40698	-1.02119
COX14	0.332579	0.0262776	2.5729	-3.40832	0.380925
C19orf44	0.332761	0.0263074	-2.57226	-3.40934	-0.29655
FBXO42	0.332991	0.026341	-2.57154	-3.41048	-0.307084
LTV1	0.333159	0.0263824	2.57065	-3.41189	0.591215
CDC42SE1	0.333159	0.0263883	2.57053	-3.41209	0.609833
STRADB	0.333159	0.0264078	2.57011	-3.41276	0.646768
CDC26	0.333159	0.0264158	2.56994	-3.41303	0.56804
GLA	0.333495	0.0264728	2.56872	-3.41496	0.723363
MDN1	0.333495	0.0264732	-2.56871	-3.41498	-0.323509
SPSB1	0.333752	0.026518	2.56775	-3.41649	0.90182
MNT	0.333752	0.0265245	-2.56761	-3.41671	-0.466198
RP13-270P17.3	0.334083	0.0265662	2.56673	-3.41812	0.647872
PRKACB	0.334145	0.0265951	-2.56611	-3.4191	-0.696561
MTMR11	0.334145	0.0266247	-2.56548	-3.4201	-0.452413
PCBD1	0.334145	0.0266282	2.56541	-3.42021	0.462735
ASL	0.334145	0.0266441	2.56507	-3.42075	0.68763
RP11-846E15.4	0.334145	0.0266534	-2.56487	-3.42106	-1.38345
TATDN1	0.334145	0.0266714	2.56449	-3.42167	0.482625
DDC-AS1	0.334145	0.0266792	2.56433	-3.42193	0.202302
RP4-635E18.8	0.334191	0.0266982	-2.56392	-3.42257	-0.754509
GZMH	0.334503	0.0267386	2.56307	-3.42392	1.2474
GTF3C4	0.334807	0.0267784	-2.56223	-3.42526	-0.443093
MMP12	0.335695	0.0268649	2.5604	-3.42815	0.269285
MTA2	0.336628	0.0269552	2.5585	-3.43116	0.240072
SP140L	0.336759	0.0269857	2.55786	-3.43217	0.542095
CHST12	0.336759	0.0270153	-2.55724	-3.43316	-0.467348
RP11-1C8.6	0.336759	0.0270435	-2.55665	-3.43409	-0.306286
MRPL51	0.336759	0.0270663	2.55617	-3.43485	0.382392
ELMO2	0.336759	0.0270692	-2.55611	-3.43494	-0.3308
ACVR2B	0.336759	0.0270756	-2.55598	-3.43516	-0.46136
PRPF4B	0.336759	0.0270862	2.55576	-3.43551	0.339471
NDUFB9	0.336759	0.02709	2.55568	-3.43563	0.344496
FGFR3	0.336972	0.0271227	-2.555	-3.43671	-0.939939
LOC100506286	0.337855	0.0272094	2.55319	-3.43957	0.191748
SWAP70	0.338029	0.0272465	2.55242	-3.4408	0.603208
2019-03-06	0.338029	0.027255	-2.55224	-3.44108	-0.427102
CMTM4	0.338029	0.0272702	-2.55193	-3.44158	-0.493353
KRTAP11-1	0.338309	0.0273085	2.55113	-3.44283	0.210071
PGGT1B	0.338556	0.0273482	2.55031	-3.44414	0.51373
ZNF431	0.338556	0.0273597	-2.55007	-3.44451	-0.521201
MLXIP	0.338611	0.0273797	-2.54966	-3.44517	-0.253595
ICA1L	0.338834	0.0274244	-2.54874	-3.44663	-0.210413
AC079305.10	0.338834	0.0274291	2.54864	-3.44678	0.312047
PHF23	0.338844	0.0274455	2.5483	-3.44732	0.380805
MAPT	0.339211	0.0274909	-2.54737	-3.4488	-0.72536
LEPROTL1	0.339541	0.0275333	2.54649	-3.45018	0.598046
GLCE	0.339574	0.0275645	-2.54585	-3.4512	-1.01115
ASH1L	0.339574	0.0275673	-2.5458	-3.45129	-0.350368
PRR14L	0.33979	0.0276006	-2.54511	-3.45237	-0.306997
PRRT2	0.339944	0.0276288	-2.54454	-3.45329	-2.05889
LSR	0.340121	0.0276589	2.54392	-3.45426	0.215063
CMTM6	0.340133	0.027683	2.54343	-3.45504	0.697858
CACNA1D	0.340133	0.0276913	-2.54326	-3.45531	-0.609097
TIMM23B	0.340254	0.027748	2.5421	-3.45715	0.856496
SOCS7	0.340254	0.0277581	-2.54189	-3.45747	-0.707896
DCP1B	0.340254	0.0277594	-2.54187	-3.45751	-0.429882
IL6ST	0.340254	0.0277887	2.54127	-3.45846	0.521222
BRINP3	0.340254	0.0278156	-2.54072	-3.45932	-1.74081
IFI6	0.340254	0.0278171	2.54069	-3.45937	0.334063
FUOM	0.340254	0.027824	2.54055	-3.45959	0.433862
DNAJC16	0.340254	0.0278339	-2.54035	-3.45991	-0.515209
MED13L	0.340254	0.0278501	-2.54002	-3.46044	-0.423893
SRL	0.340254	0.0278587	2.53984	-3.46071	0.485988
LOC101928399	0.340254	0.0278739	2.53953	-3.4612	0.304635
LOC100128164	0.340572	0.027927	2.53846	-3.4629	0.25551
BDKRB2	0.340572	0.0279362	-2.53827	-3.4632	-0.546562
LOC285147	0.340572	0.027994	-2.5371	-3.46505	-1.7182
ARPC2	0.340572	0.0280036	2.53691	-3.46536	0.736119
ECSCR	0.340572	0.0280092	2.53679	-3.46554	1.07499
CRISPLD1	0.340572	0.0280405	-2.53616	-3.46654	-1.32728
TMEM231	0.340572	0.028044	-2.53609	-3.46665	-0.437981
DDX5	0.340572	0.0280528	-2.53591	-3.46693	-0.620137
CUTA	0.340572	0.0280636	2.5357	-3.46728	0.326819
CTTNBP2NL	0.340572	0.0280675	2.53562	-3.4674	0.470996
DIABLO	0.340572	0.028073	2.53551	-3.46758	0.44687
LOC1720	0.34069	0.028108	2.5348	-3.46869	0.182269
HPSE	0.34069	0.0281176	2.53461	-3.469	1.01716
LANCL3	0.34069	0.0281306	-2.53435	-3.46941	-1.21639
BTBD19	0.34069	0.0281457	2.53404	-3.46989	0.198313
LOC101928132	0.341126	0.0282044	2.53286	-3.47176	0.324434
CCDC80	0.341126	0.0282132	2.53269	-3.47204	0.452187
ZNF554	0.341272	0.0282551	-2.53185	-3.47337	-0.38682
ALOX12B	0.341272	0.0282568	-2.53181	-3.47342	-0.265702
LATS2	0.341683	0.0283078	2.53079	-3.47504	0.5776
CYR61	0.341683	0.0283298	2.53035	-3.47573	1.81244
PHF21B	0.341683	0.0283412	-2.53012	-3.47609	-0.596012
KRIT1	0.341683	0.0283681	-2.52959	-3.47694	-0.407675
USP32P2	0.341683	0.0283912	-2.52912	-3.47767	-0.588734
PSMB3	0.341683	0.0283951	2.52905	-3.4778	0.551898
GS1-166A23.2	0.341683	0.0284159	-2.52863	-3.47845	-0.366655
HES7	0.341683	0.028417	2.52861	-3.47849	0.241411
CD58	0.342047	0.0284631	2.52769	-3.47994	0.476625
ING5	0.342136	0.0284968	-2.52702	-3.481	-0.482552
TMEM61	0.342136	0.0285021	-2.52692	-3.48116	-0.209467
DLG2	0.342669	0.0285773	-2.52542	-3.48352	-0.596999
SPRR2B	0.342669	0.0285807	2.52536	-3.48363	0.302715
LINC00158	0.342669	0.028594	-2.52509	-3.48405	-0.2066
HIST1H4J	0.342785	0.0286195	2.52459	-3.48484	0.638522
CEBPG	0.343094	0.0286611	2.52377	-3.48615	0.740188
C12orf49	0.343547	0.0287149	2.52271	-3.48782	0.302719
BIN3-IT1	0.343793	0.0287638	2.52174	-3.48935	0.612378
LYSMD3	0.343793	0.0287672	-2.52167	-3.48945	-0.556941
APBA2	0.344071	0.0288063	-2.52091	-3.49067	-0.854742
ARHGAP26-AS1	0.344191	0.028845	2.52014	-3.49187	0.226852
S100A4	0.344191	0.0288482	2.52008	-3.49197	1.30191
RBBP8	0.344224	0.0288673	2.51971	-3.49256	0.764627
FAM149B1	0.344224	0.0288827	2.5194	-3.49304	0.341566
RP11-548H18.2	0.344262	0.0289026	2.51901	-3.49366	0.35475
SEC61B	0.344262	0.0289233	2.51861	-3.4943	0.488704
UNG	0.344262	0.0289336	-2.51841	-3.49462	-0.759827
CKB	0.344368	0.0289584	-2.51792	-3.49538	-0.857692
OSER1	0.344413	0.0289781	2.51754	-3.49599	0.406213
KIF15	0.344433	0.0290136	-2.51684	-3.49709	-0.465364
ELL2	0.344433	0.0290345	2.51644	-3.49773	0.712479
YPEL1	0.344433	0.0290367	-2.51639	-3.4978	-0.916043
GRAMD1A	0.344433	0.0290463	2.51621	-3.4981	0.351712
CDKL2	0.344433	0.0290593	-2.51595	-3.4985	-0.56369
UFM1	0.344588	0.0290934	2.51529	-3.49955	0.612528
VPS29	0.344588	0.0291042	2.51508	-3.49988	0.295351
MED10	0.345309	0.029181	2.51358	-3.50224	0.480748
PSMB10	0.345728	0.0292324	2.51259	-3.50381	0.566478
FAM181A	0.345793	0.0292632	-2.51199	-3.50475	-0.596615
LINC00937	0.345793	0.0292699	-2.51186	-3.50496	-0.225782
PAEP	0.345987	0.0293132	2.51102	-3.50628	0.204823
POLB	0.345987	0.0293339	2.51062	-3.50691	0.292969
PEX10	0.345987	0.0293342	2.51062	-3.50692	0.443099
ZNF157	0.346007	0.0293952	-2.50944	-3.50878	-0.205176
C3AR1	0.346007	0.0294094	2.50917	-3.50922	0.824696
MARVELD2	0.346007	0.0294231	2.5089	-3.50963	0.354764
NEURL4	0.346007	0.0294287	-2.5088	-3.5098	-0.354343
MRPL42	0.346007	0.0294301	2.50877	-3.50984	0.449101
C9orf173	0.346007	0.0294466	2.50845	-3.51035	0.291327
EIF5A	0.346007	0.0294706	2.50799	-3.51107	0.511014
ACVR1C	0.346007	0.0294842	-2.50773	-3.51149	-0.83274
FYN	0.346007	0.0294925	-2.50757	-3.51174	-0.556902
CCR10	0.346007	0.029513	-2.50717	-3.51236	-0.373007
C10orf12	0.346007	0.0295315	-2.50682	-3.51292	-0.234007
GRIN3A	0.346007	0.0295396	-2.50666	-3.51317	-0.769038
ZNF629	0.346007	0.0295611	-2.50625	-3.51382	-0.508963
PIK3IP1	0.346007	0.0295633	-2.50621	-3.51389	-0.272426
SPEF2	0.346007	0.029588	-2.50574	-3.51463	-0.158169
UBE2J1	0.346007	0.0295948	2.50561	-3.51484	0.438695
ARHGAP35	0.346007	0.0296233	-2.50506	-3.5157	-0.616768
ZNF205-AS1	0.346007	0.0296235	-2.50506	-3.5157	-0.202492
ZNF783	0.346099	0.0296474	-2.5046	-3.51642	-0.483686
DAPK1	0.346106	0.0296778	-2.50402	-3.51734	-0.944611
AP5B1	0.346106	0.0296985	-2.50362	-3.51797	-0.37614
MCTP2	0.346106	0.0297118	2.50337	-3.51837	0.371536
SGMS2	0.346106	0.0297119	2.50337	-3.51837	0.419614
FNDC3A	0.346172	0.0297336	2.50295	-3.51902	0.406783
GNAI3	0.346733	0.0297978	2.50173	-3.52095	0.820345
A2M	0.346899	0.029828	2.50116	-3.52186	0.642227
IGF2R	0.346996	0.029868	2.5004	-3.52306	0.336472
VPRBP	0.346996	0.0298684	-2.50039	-3.52307	-0.328642
CHKB-AS1	0.347165	0.029899	2.49981	-3.52399	0.230803
RASSF10	0.347166	0.0299151	-2.4995	-3.52447	-0.323899
PSD3	0.347637	0.0299727	-2.49842	-3.52619	-1.37382
RPL41	0.347637	0.0299977	2.49794	-3.52693	0.352997
TRO	0.347637	0.0300038	-2.49783	-3.52712	-0.547733
SPP1	0.347669	0.0300227	2.49747	-3.52768	1.63905
FADD	0.347697	0.0300564	-2.49683	-3.52868	-0.714155
RP5-882O7.1	0.347697	0.0300598	2.49677	-3.52878	0.469163
EP300	0.347697	0.0300733	-2.49652	-3.52918	-0.747795
ZNF575	0.348026	0.0301178	-2.49568	-3.5305	-0.442563
SOBP	0.348112	0.030151	-2.49505	-3.53149	-0.179955
SF3B3	0.348112	0.030168	-2.49473	-3.532	-0.270248
CACNA2D1	0.348112	0.0301734	-2.49463	-3.53216	-0.509339
FAM73B	0.348121	0.0302381	-2.49342	-3.53407	-0.527926
NSA2	0.348121	0.0302452	2.49328	-3.53428	0.624997
C8orf44	0.348121	0.030266	-2.49289	-3.5349	-0.277005
PSAP	0.348121	0.0303	2.49226	-3.5359	0.368596
SH2D3A	0.348121	0.0303208	2.49187	-3.53651	0.168936
APCDD1	0.348121	0.0303304	-2.49169	-3.5368	-0.877352
BIRC3	0.348121	0.0303342	2.49162	-3.53691	1.46258
QRICH1	0.348121	0.0303378	-2.49155	-3.53701	-0.358679
NALCN	0.348121	0.0303577	-2.49118	-3.5376	-0.477467
CELF6	0.348121	0.0303617	-2.4911	-3.53772	-0.770414
RPAIN	0.348121	0.030372	-2.49091	-3.53802	-0.288916
PRB1	0.348121	0.0303726	2.4909	-3.53804	0.253375
ELFN2	0.348121	0.0303832	-2.4907	-3.53835	-0.678874
MRGBP	0.348721	0.030465	2.48918	-3.54075	0.388629
LOC102724017	0.348721	0.0304678	2.48913	-3.54084	0.998739
ADCK3	0.349568	0.0305746	-2.48714	-3.54396	-0.423348
NOP16	0.349568	0.0305833	2.48698	-3.54422	0.33249
AC012065.7	0.349568	0.0305902	-2.48685	-3.54442	-0.624441
LOC202181	0.349727	0.0306382	-2.48596	-3.54582	-0.369384
LOC100288310	0.349727	0.0306631	-2.4855	-3.54655	-1.89072
GDF15	0.349727	0.0306647	2.48547	-3.54659	0.328431
AIM1L	0.349727	0.0306791	2.48521	-3.54701	0.221339
CKLF	0.349727	0.0306849	2.4851	-3.54718	0.549285
TRPS1	0.34991	0.0307171	-2.48451	-3.54812	-0.539616
VPS13D	0.350421	0.0308077	-2.48283	-3.55075	-0.275416
TSHZ2	0.350421	0.0308175	-2.48265	-3.55104	-0.48
C16orf82	0.350421	0.0308361	2.48231	-3.55157	0.250294
GABPB1	0.350421	0.0308583	2.4819	-3.55222	0.635699
COPB2	0.350421	0.0308788	2.48153	-3.55281	0.311558
EIF3G	0.350421	0.0308863	2.48139	-3.55303	0.71765
AK5	0.350421	0.030891	-2.4813	-3.55317	-0.715954
RP11-631N16.2	0.350421	0.0308914	-2.4813	-3.55318	-0.52415
SEC11A	0.350519	0.0309163	2.48084	-3.5539	0.693289
GPR107	0.350596	0.0309392	2.48042	-3.55456	0.505236
EBI3	0.350911	0.0309833	2.47961	-3.55583	0.876215
MRPL17	0.351045	0.0310112	2.4791	-3.55664	0.709769
CHAMP1	0.351249	0.0310607	-2.4782	-3.55806	-0.367967
NUS1	0.351249	0.0311028	2.47743	-3.55927	0.541683
MS4A7	0.351249	0.0311071	2.47735	-3.5594	0.916131
CCL2	0.351249	0.0311075	2.47734	-3.55941	1.91542
SOS1	0.351249	0.0311104	-2.47729	-3.55949	-0.279125
GPNMB	0.351337	0.0311344	2.47685	-3.56018	1.91166
EREG	0.351561	0.0311705	2.47619	-3.56121	0.978537
RP11-251G23.5	0.351633	0.0312326	-2.47506	-3.56299	-0.302969
FLJ41455	0.351633	0.0312515	2.47472	-3.56353	0.885915
C3orf17	0.351633	0.0312524	2.47471	-3.56356	0.247475
KRTAP8-1	0.351633	0.0312615	2.47454	-3.56382	0.180922
GOSR1	0.351633	0.0312712	-2.47437	-3.56409	-0.224001
GTPBP3	0.351633	0.0313071	-2.47371	-3.56512	-0.256828
AHCYL1	0.351633	0.0313206	-2.47347	-3.56551	-0.552245
DFFA	0.351633	0.0313354	2.4732	-3.56593	0.296104
CCRN4L	0.351633	0.031336	2.47319	-3.56594	0.608053
ZNF107	0.351633	0.0313393	-2.47313	-3.56604	-0.287092
CTHRC1	0.351926	0.0313816	2.47237	-3.56724	1.48322
TIMM17B	0.352228	0.0314248	2.47159	-3.56847	0.315215
PTPN1	0.352487	0.0314685	2.4708	-3.56971	0.192
CBX6	0.352487	0.0314805	-2.47058	-3.57005	-0.804936
ASAP2	0.352604	0.0315072	-2.4701	-3.57081	-0.890948
NCKAP1L	0.352697	0.0315415	2.46948	-3.57178	0.462927
ATP6V0A4	0.352697	0.0315636	2.46908	-3.57241	0.160151
AQP9	0.352697	0.0315644	2.46907	-3.57243	0.896177
LY6K	0.35309	0.0316158	2.46815	-3.57389	0.568304
NLK	0.353178	0.0316684	-2.4672	-3.57537	-0.357493
C4orf3	0.353178	0.0316706	2.46716	-3.57543	0.433086
IRS1	0.353178	0.031673	-2.46712	-3.5755	-0.663364
UXT	0.353178	0.031689	2.46683	-3.57595	0.790482
LHX2	0.353429	0.0317391	-2.46594	-3.57736	-1.96047
MAK	0.353429	0.031769	-2.4654	-3.5782	-0.29676
RP11-932O9.10	0.353429	0.0317861	2.4651	-3.57868	0.227094
IL17RD	0.353429	0.0317887	-2.46505	-3.57875	-0.462607
GATAD2B	0.353429	0.0317931	-2.46497	-3.57888	-0.622371
PRB4	0.353764	0.0318396	2.46414	-3.58018	0.205977
C10orf88	0.354165	0.031892	-2.46321	-3.58165	-0.899544
HLA-DRB6	0.354769	0.0319891	2.46148	-3.58437	0.419782
NHP2	0.354769	0.0320162	2.461	-3.58512	0.402702
GLRX2	0.354769	0.0320179	2.46097	-3.58517	0.643703
NTRK2	0.354769	0.032028	-2.4608	-3.58545	-0.88917
BMP15	0.354769	0.032029	2.46078	-3.58548	0.282045
KIAA0020	0.354769	0.0320548	2.46032	-3.5862	0.402695
KLHL26	0.354769	0.0320828	-2.45983	-3.58698	-0.412561
GAPDH	0.354769	0.0321006	2.45951	-3.58747	0.653263
ATE1	0.354769	0.0321108	-2.45933	-3.58776	-0.194189
TCN2	0.354769	0.0321111	2.45932	-3.58776	0.361004
SLC22A17	0.354769	0.0321266	-2.45905	-3.58819	-0.370323
STARD7	0.3552	0.0321858	-2.458	-3.58984	-0.43876
DDX60L	0.3552	0.0321984	2.45778	-3.59019	0.86245
IGSF6	0.355221	0.0322167	2.45746	-3.5907	0.618637
LOC100131510	0.355866	0.0322917	-2.45614	-3.59277	-0.244236
RASGRF2	0.356284	0.0323551	-2.45503	-3.59452	-0.655606
FOXP1	0.356284	0.0323668	-2.45482	-3.59484	-0.351988
BMP6	0.356284	0.0323872	2.45446	-3.59541	0.20738
DDR2	0.356284	0.0324015	2.45421	-3.5958	0.44332
DDX21	0.356284	0.0324119	2.45403	-3.59609	0.729155
STARD13-AS	0.35691	0.0324887	2.45269	-3.5982	0.251349
TPM2	0.35691	0.0325141	2.45224	-3.59889	0.471429
TRIB2	0.35691	0.0325183	-2.45217	-3.59901	-0.612672
AIF1	0.357814	0.0326206	2.45039	-3.60181	0.854954
ATP6V0B	0.357814	0.0326517	2.44985	-3.60266	0.620025
ZNF596	0.357814	0.0326722	-2.44949	-3.60322	-0.349176
HMHA1	0.357814	0.032684	2.44928	-3.60355	0.580678
DEDD	0.357814	0.0326946	2.4491	-3.60383	0.220145
CNOT4	0.357814	0.0326998	-2.44901	-3.60398	-0.276097
HPS5	0.357939	0.0327327	2.44844	-3.60488	0.901315
AF086184	0.357939	0.0327442	-2.44824	-3.60519	-0.171806
CD52	0.358618	0.0328626	2.44619	-3.60841	0.571268
MYT1	0.358618	0.0328679	-2.4461	-3.60855	-0.44142
LINC01252	0.358618	0.0328691	-2.44608	-3.60858	-0.281311
LOC100506371	0.358618	0.0328982	2.44557	-3.60937	0.339315
PPP2R5C	0.358618	0.0329016	2.44552	-3.60947	0.450859
BMS1	0.358618	0.0329057	2.44544	-3.60958	0.54392
HEPH	0.358795	0.0329386	-2.44488	-3.61047	-0.452929
ITGA4	0.35887	0.032962	2.44447	-3.6111	0.241807
SFXN1	0.359263	0.0330147	-2.44357	-3.61253	-0.282203
CCDC17	0.359537	0.0330565	-2.44285	-3.61366	-0.330667
SERPINB1	0.359564	0.0331029	2.44205	-3.61491	0.722195
PPRC1	0.359564	0.0331048	2.44202	-3.61496	0.415451
LMNA	0.359564	0.0331224	2.44172	-3.61543	0.735348
MPPED1	0.359564	0.033176	-2.4408	-3.61688	-1.22296
NUP153	0.359564	0.0331791	2.44074	-3.61696	0.326427
BC047484	0.359564	0.0331794	-2.44074	-3.61696	-0.570409
LMAN1	0.359564	0.0332013	2.44036	-3.61755	0.258205
DNAJB1	0.359564	0.0332187	2.44007	-3.61802	1.80297
[truncated: 19,656 more rows]
